# Supplementary material
Source: MDPI journal article supplement (https://www.mdpi.com/2076-3263/13/10/315)

Distinctive Accumulation Patterns of Trace Elements in Sediments of Bedrock Rivers (Miño River, NW Iberian Peninsula)

Álvarez-Vázquez, M.A.; De Uña-Álvarez, E.; Ramírez-Pérez, A.M.; DE Blas, E.; Prego, R.

REGRESSIONS As (F2)

|                        |        |          |
|------------------------|--------|----------|
| BGfunction             | R      | n (%)    |
| AsBG = 13.5[Al] - 49.0 | 0.606  | 14 (61%) |
| AsBG = 585[Ca] - 74    | 0.758  | 16 (70%) |
| AsBG = 0.08[Rb] + 9.37 | 0.249  | 15 (65%) |
| AsBG = 0.13[Y] + 28.42 | -0.045 | 15 (65%) |

|       | As (F2) | Al (F2) | As(F2) - Al | Ca (F2) | As(F2) - Ca | Rb (F2) | As(F2) - Rb | Y (F2) | As(F2) - Y |
|-------|---------|---------|-------------|---------|-------------|---------|-------------|--------|------------|
| POT01 | 25.95   | 4.11    | 25.95       | 0.18    | 25.95       | 175.93  | 25.95       | 27.97  | 25.95      |
| POT02 | 40.76   | 5.48    | 40.76       | 0.18    | 40.76       | 169.14  | 40.76       | 14.98  | 40.76      |
| POT03 | 19.03   | 5.14    | 19.03       | 0.14    | 19.03       | 227.69  | 19.03       | 15.00  | 19.03      |
| POT04 | 37.11   | 5.83    | 37.11       | 0.16    | 37.11       | 202.67  | 37.11       | 7.41   | 37.11      |
| POT05 | 0.83    | 5.44    | 0.83        | 0.13    | 0.83        | 254.62  | 0.83        | 19.88  | 0.83       |
| POT06 | 44.77   | 6.38    | 44.77       | 0.20    | 44.77       | 251.98  | 44.77       | 20.90  | 44.77      |
| POT07 | n.d.    | 5.21    |             | 0.13    |             | 207.41  |             | 18.94  |            |
| POT08 | 36.38   | 5.82    | 36.38       | 0.17    | 36.38       | 129.66  | 36.38       | 13.16  | 36.38      |
| POT09 | 53.90   | 7.62    | 53.90       | 0.23    | 53.90       | 336.92  | 53.90       | 21.94  | 53.90      |
| POT10 | 26.17   | 6.06    | 26.17       | 0.18    | 26.17       | 139.31  | 26.17       | 8.94   | 26.17      |
| POT11 | 0.99    | 5.11    | 0.99        | 0.16    | 0.99        | 215.95  | 0.99        | 23.59  | 0.99       |
| POT12 | 1.05    | 6.06    |             | 0.19    |             | 243.79  | 1.05        | 24.86  | 1.05       |
| COR01 | 71.71   | 5.92    |             | 0.24    | 71.71       | 244.55  |             | 23.86  |            |
| COR02 | 85.63   | 6.18    |             | 0.23    | 85.63       | 230.46  |             | 22.24  |            |
| COR03 | 23.83   | 5.69    | 23.83       | 0.19    | 23.83       | 229.31  | 23.83       | 18.75  | 23.83      |
| COR04 | 343.69  | 6.12    |             | 0.21    |             | 238.09  |             | 20.62  |            |
| COR05 | 136.52  | 5.37    |             | 0.19    |             | 213.60  |             | 31.27  |            |
| COR06 | 29.98   | 5.82    | 29.98       | 0.22    | 29.98       | 199.79  | 29.98       | 15.42  | 29.98      |
| COR07 | 48.20   | 5.91    | 48.20       | 0.17    | 48.20       | 275.83  | 48.20       | 23.87  | 48.20      |
| COR08 | 327.39  | 6.26    |             | 0.19    |             | 247.92  |             | 31.15  |            |
| COR09 | 95.67   | 5.84    |             | 0.23    |             | 138.36  |             | 13.36  |            |
| COR10 | 2.93    | 5.31    | 2.93        | 0.17    | 2.93        | 138.71  | 2.93        | 9.48   | 2.93       |
| COR11 | 70.55   | 4.54    |             | 0.13    |             | 138.99  |             | 6.91   |            |
| COR12 | 691.48  | 5.02    |             | 0.14    |             | 127.16  |             | 3.24   |            |

|         |       |       |       |       |
|---------|-------|-------|-------|-------|
| Average | 27.92 | 34.26 | 26.12 | 26.12 |
| SD      | 17.28 | 23.78 | 18.04 | 18.04 |
| RSD     | 0.62  | 0.69  | 0.69  | 0.69  |
| 1+RSD   | 1.6   | 1.7   | 1.7   | 1.7   |
| 1+2RSD  | 2.2   | 2.4   | 2.4   | 2.4   |
| 1+3RSD  | 2.9   | 3.1   | 3.1   | 3.1   |

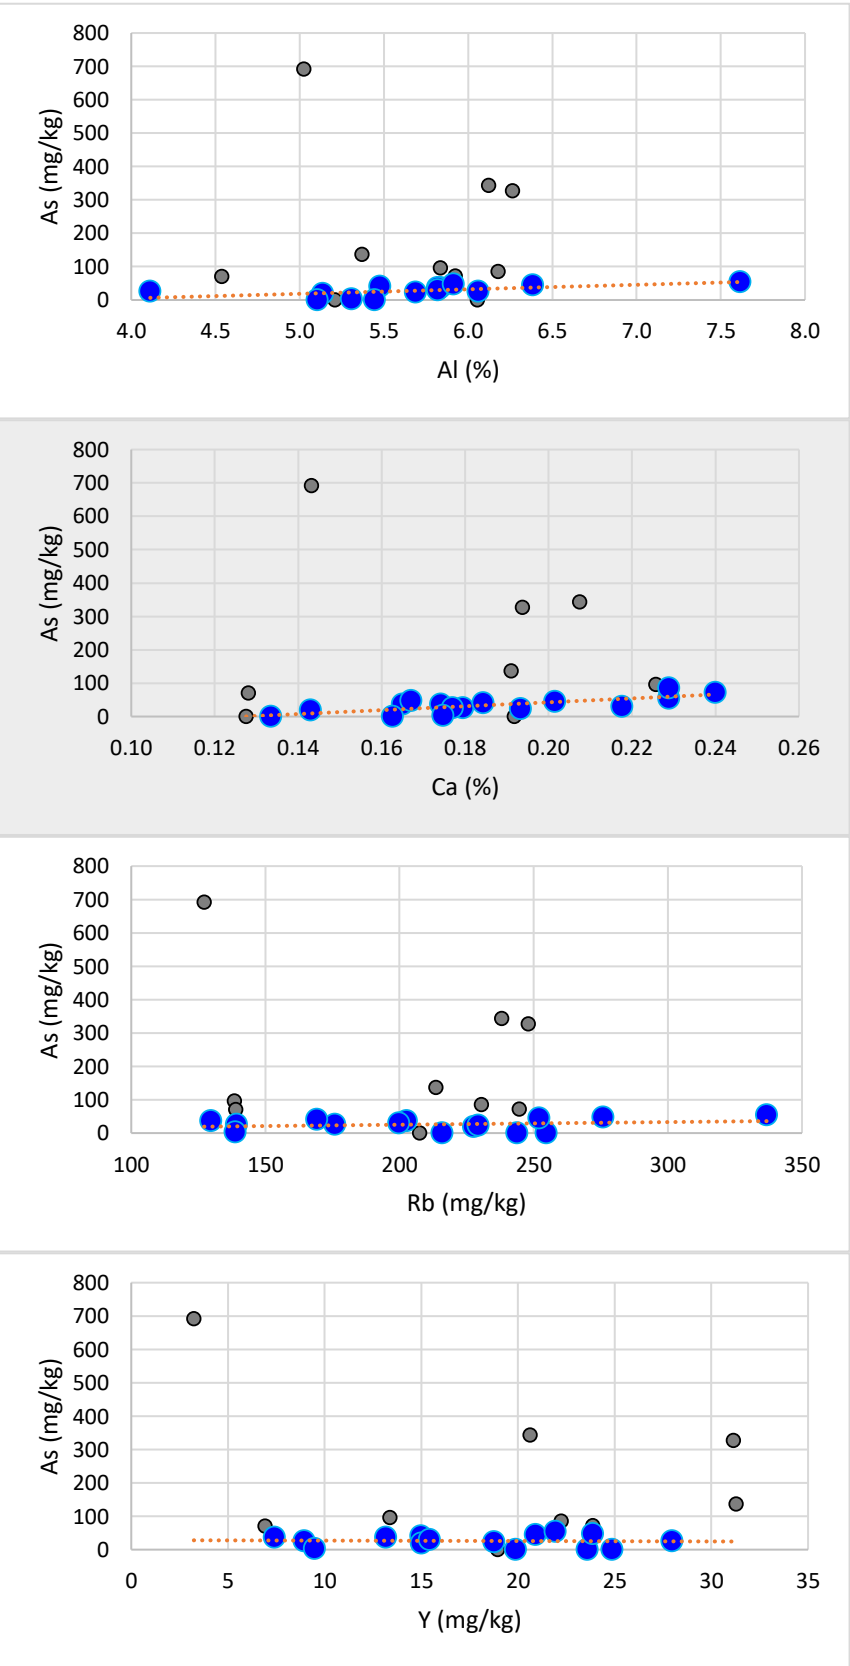

Distinctive Accumulation Patterns of Trace Elements in Sediments of Bedrock Rivers (Miño River, NW Iberian Peninsula)

Álvarez-Vázquez, M.A.; De Uña-Álvarez, E.; Ramírez-Pérez, A.M.; DE Blas, E.; Prego, R.

REGRESSIONS As (F63)

|                           |        |          |
|---------------------------|--------|----------|
| BGfunction                | R      | n (%)    |
| AsBG = 199[Al] - 216      | 0.856  | 13 (54%) |
| AsBG = - 51.4[Ca] + 123.4 | -0.123 | 17 (71%) |
| AsBG = -4.52[Rb] + 224.85 | -0.333 | 16 (66%) |
| AsBG = 8.81[Y] - 75.28    | 0.338  | 17 (71%) |

|       | As (F63) | Al (F63) | As(F63) - Al | Ca (F63) | As(F63) - Ca | Rb (F63) | As(F63) - Rb | Y (F63) | As(F63) - Y |
|-------|----------|----------|--------------|----------|--------------|----------|--------------|---------|-------------|
| POT01 | 45.77    | 1.39     | 45.77        | 1.10     | 45.77        | 25.82    | 45.77        | 21.71   | 45.77       |
| POT02 | 43.41    | 1.70     | 43.41        | 0.31     | 43.41        | 28.69    | 43.41        | 22.69   | 43.41       |
| POT03 | 37.56    | 1.43     | 37.56        | 0.48     | 37.56        | 21.72    | 37.56        | 21.72   | 37.56       |
| POT04 | 47.18    | 1.38     | 47.18        | 0.39     | 47.18        | 28.09    | 47.18        | 21.48   | 47.18       |
| POT05 | 47.60    | 1.54     | 47.60        | 0.43     | 47.60        | 27.60    | 47.60        | 21.80   | 47.60       |
| POT06 | 234.39   | 1.46     | 234.39       | 0.33     | 234.39       | 33.70    | 234.39       | 19.94   | 234.39      |
| POT07 | 58.00    | 1.15     | 58.00        | 0.37     | 58.00        | 47.00    | 58.00        | 12.67   | 58.00       |
| POT08 | 29.60    | 1.20     | 29.60        | 0.22     | 29.60        | 32.63    | 29.60        | 14.07   | 29.60       |
| POT09 | 47.14    | 1.07     | 47.14        | 0.20     | 47.14        | 26.86    | 47.14        | 18.06   | 47.14       |
| POT10 | 43.57    | 1.38     | 43.57        | 0.27     | 43.57        | 32.68    | 43.57        | 18.43   | 43.57       |
| POT11 | 43.52    | 1.49     | 43.52        | 0.38     | 43.52        | 28.24    | 43.52        | 19.56   | 43.52       |
| POT12 | 52.03    | 1.48     | 52.03        | 0.39     | 52.03        | 32.29    | 52.03        | 21.21   | 52.03       |
| COR01 | 211.40   | 1.56     | 211.40       | 0.41     | 211.40       | 23.62    | 211.40       | 18.68   | 211.40      |
| COR02 | 238.26   | 1.85     | 238.26       | 0.43     | 238.26       | 24.73    | 238.26       | 21.35   | 238.26      |
| COR03 | 466.29   | 1.71     | 466.29       | 0.33     | 466.29       | 24.80    | 466.29       | 21.28   | 466.29      |
| COR04 | 545.62   | 1.71     | 545.62       | 0.39     | 545.62       | 24.47    | 545.62       | 21.19   | 545.62      |
| COR05 | 847.06   | 1.92     | 847.06       | 0.28     | 847.06       | 24.50    | 847.06       | 21.44   | 847.06      |
| COR06 | 463.19   | 1.96     | 463.19       | 0.30     | 463.19       | 26.88    | 463.19       | 23.37   | 463.19      |
| COR07 | 218.98   | 2.03     | 218.98       | 0.30     | 218.98       | 27.72    | 218.98       | 25.16   | 218.98      |
| COR08 | 961.39   | 1.95     | 961.39       | 0.25     | 961.39       | 26.22    | 961.39       | 20.60   | 961.39      |
| COR09 | 413.69   | 1.85     | 413.69       | 0.30     | 413.69       | 27.01    | 413.69       | 20.69   | 413.69      |
| COR10 | 191.04   | 1.79     | 191.04       | 0.37     | 191.04       | 26.71    | 191.04       | 22.31   | 191.04      |
| COR11 | 165.05   | 1.89     | 165.05       | 0.30     | 165.05       | 25.60    | 165.05       | 23.45   | 165.05      |
| COR12 | 1823.93  | 1.66     | 1823.93      | 0.20     | 1823.93      | 25.05    | 1823.93      | 9.36    | 1823.93     |

|         |       |        |       |        |
|---------|-------|--------|-------|--------|
| Average | 79.00 | 103.21 | 95.01 | 103.21 |
| SD      | 65.52 | 82.86  | 78.13 | 82.86  |
| RSD     | 0.83  | 0.80   | 0.82  | 0.80   |
| 1+RSD   | 1.8   | 1.8    | 1.8   | 1.8    |
| 1+2RSD  | 2.7   | 2.6    | 2.6   | 2.6    |
| 1+3RSD  | 3.5   | 3.4    | 3.5   | 3.4    |

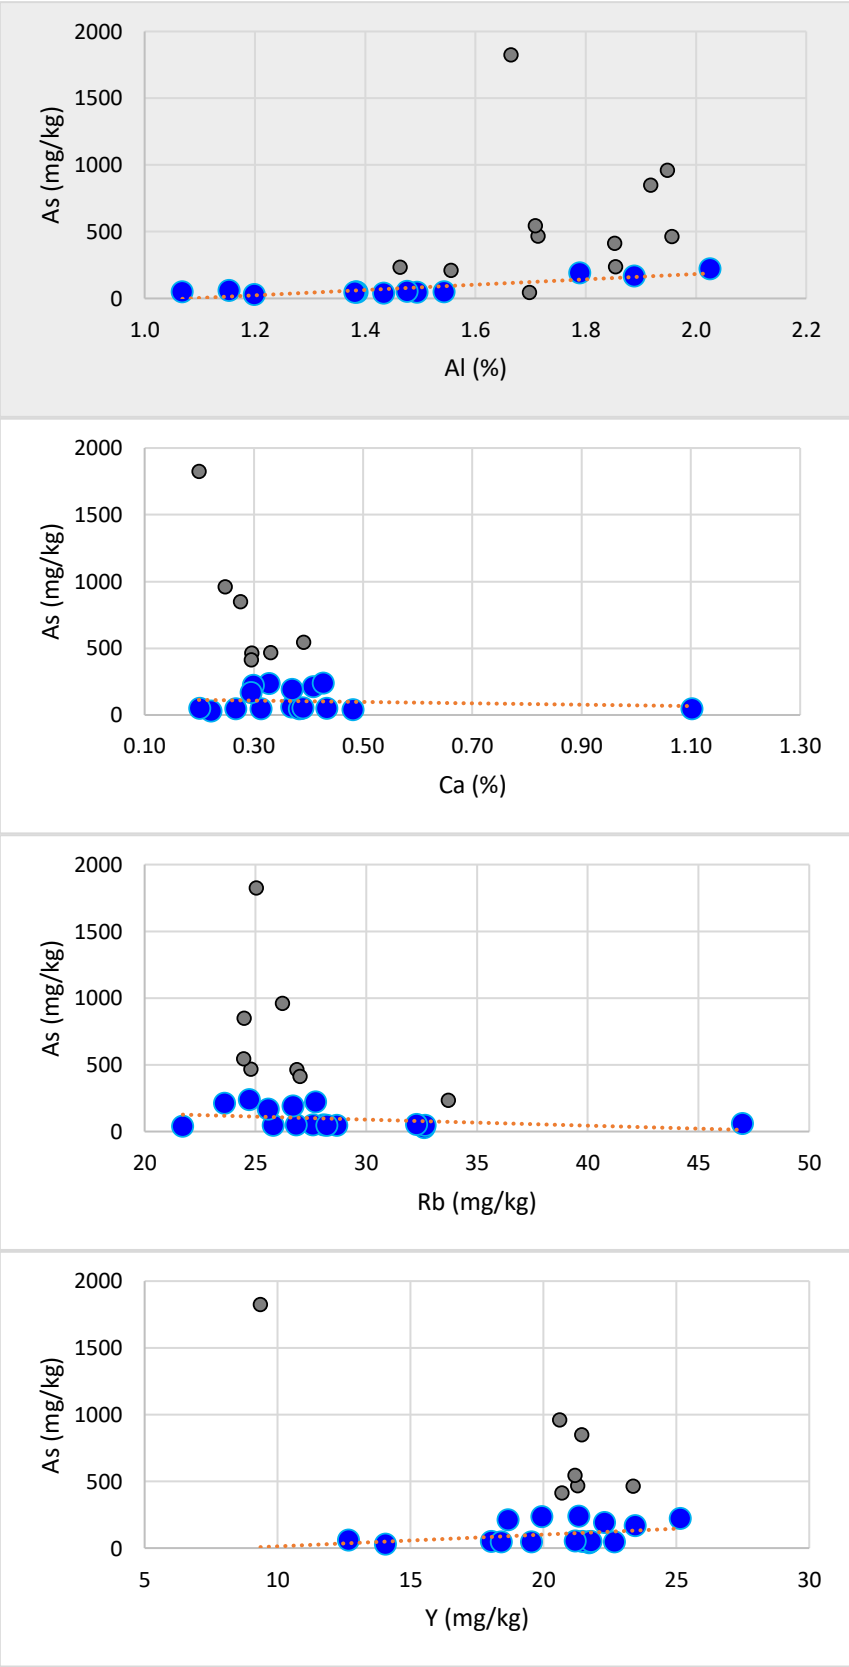

Distinctive Accumulation Patterns of Trace Elements in Sediments of Bedrock Rivers (Miño River, NW Iberian Peninsula)

Álvarez-Vázquez, M.A.; De Uña-Álvarez, E.; Ramírez-Pérez, A.M.; DE Blas, E.; Prego, R.

REGRESSIONS Cr (F2)

|                        |       |          |
|------------------------|-------|----------|
| BGfunction             | R     | n (%)    |
| CrBG = 5.11[Al] - 0.68 | 0.252 | 22 (92%) |
| CrBG = 289[Ca] - 25    | 0.574 | 22 (92%) |
| CrBG = 0.15[Rb] - 3.71 | 0.608 | 22 (92%) |
| CrBG = 1.40[Y] - 0.68  | 0.913 | 14 (58%) |

|       | Cr (F2) | Al (F2) | Cr(F2) - Al | Ca (F2) | Cr(F2) - Ca | Rb (F2) | Cr(F2) - Rb | Y (F2) | Cr(F2) - Y |
|-------|---------|---------|-------------|---------|-------------|---------|-------------|--------|------------|
| POT01 | 37.26   | 4.11    | 37.26       | 0.18    | 37.26       | 175.93  | 37.26       | 27.97  | 37.30      |
| POT02 | 12.68   | 5.48    | 12.68       | 0.18    | 12.68       | 169.14  | 12.68       | 14.98  | 12.70      |
| POT03 | 48.16   | 5.14    | 48.16       | 0.14    |             | 227.69  | 48.16       | 15.00  |            |
| POT04 | 13.38   | 5.83    | 13.38       | 0.16    | 13.38       | 202.67  | 13.38       | 7.41   | 13.40      |
| POT05 | 32.39   | 5.44    | 32.39       | 0.13    | 32.39       | 254.62  | 32.39       | 19.88  | 32.40      |
| POT06 | 43.10   | 6.38    | 43.10       | 0.20    | 43.10       | 251.98  | 43.10       | 20.90  |            |
| POT07 | 81.33   | 5.21    |             | 0.13    |             | 207.41  |             | 18.94  |            |
| POT08 | 21.78   | 5.82    | 21.78       | 0.17    | 21.78       | 129.66  | 21.78       | 13.16  | 21.80      |
| POT09 | 33.62   | 7.62    | 33.62       | 0.23    | 33.62       | 336.92  | 33.62       | 21.94  | 33.60      |
| POT10 | 6.28    | 6.06    | 6.28        | 0.18    | 6.28        | 139.31  | 6.28        | 8.94   | 6.30       |
| POT11 | 18.18   | 5.11    | 18.18       | 0.16    | 18.18       | 215.95  | 18.18       | 23.59  |            |
| POT12 | 36.51   | 6.06    | 36.51       | 0.19    | 36.51       | 243.79  | 36.51       | 24.86  | 36.50      |
| COR01 | 48.71   | 5.92    | 48.71       | 0.24    | 48.71       | 244.55  | 48.71       | 23.86  |            |
| COR02 | 61.63   | 6.18    |             | 0.23    | 61.63       | 230.46  |             | 22.24  |            |
| COR03 | 48.64   | 5.69    | 48.64       | 0.19    | 48.64       | 229.31  | 48.64       | 18.75  |            |
| COR04 | 47.69   | 6.12    | 47.69       | 0.21    | 47.69       | 238.09  | 47.69       | 20.62  |            |
| COR05 | 22.06   | 5.37    | 22.06       | 0.19    | 22.06       | 213.60  | 22.06       | 31.27  |            |
| COR06 | 24.06   | 5.82    | 24.06       | 0.22    | 24.06       | 199.79  | 24.06       | 15.42  | 24.10      |
| COR07 | 22.66   | 5.91    | 22.66       | 0.17    | 22.66       | 275.83  | 22.66       | 23.87  | 22.70      |
| COR08 | 44.31   | 6.26    | 44.31       | 0.19    | 44.31       | 247.92  | 44.31       | 31.15  | 44.30      |
| COR09 | 19.46   | 5.84    | 19.46       | 0.23    | 19.46       | 138.36  | 19.46       | 13.36  | 19.50      |
| COR10 | 16.78   | 5.31    | 16.78       | 0.17    | 16.78       | 138.71  | 16.78       | 9.48   | 16.80      |
| COR11 | 4.52    | 4.54    | 4.52        | 0.13    | 4.52        | 138.99  | 4.52        | 6.91   | 4.50       |
| COR12 | 21.12   | 5.02    | 21.12       | 0.14    | 21.12       | 127.16  | 21.12       | 3.24   |            |

|         |       |       |       |       |
|---------|-------|-------|-------|-------|
| Average | 28.33 | 28.95 | 28.33 | 23.28 |
| SD      | 14.28 | 15.41 | 14.28 | 12.13 |
| RSD     | 0.50  | 0.53  | 0.50  | 0.52  |
| 1+RSD   | 1.5   | 1.5   | 1.5   | 1.5   |
| 1+2RSD  | 2.0   | 2.1   | 2.0   | 2.0   |
| 1+3RSD  | 2.5   | 2.6   | 2.5   | 2.6   |

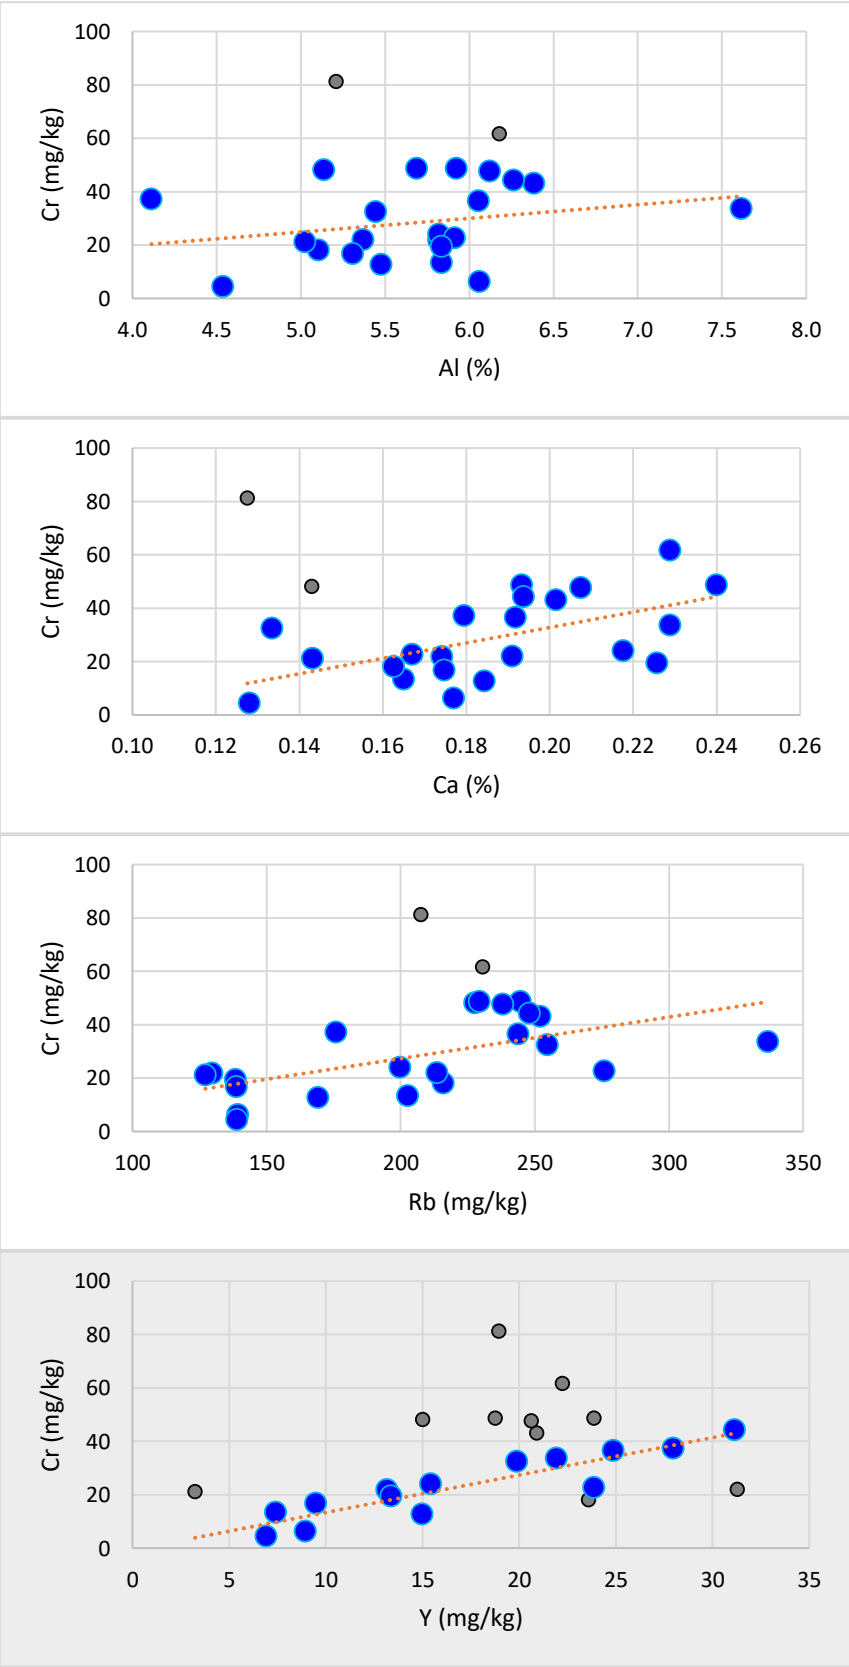

Distinctive Accumulation Patterns of Trace Elements in Sediments of Bedrock Rivers (Miño River, NW Iberian Peninsula)

Álvarez-Vázquez, M.A.; De Uña-Álvarez, E.; Ramírez-Pérez, A.M.; DE Blas, E.; Prego, R.

REGRESSIONS Cr (F63)

|                          |        |          |                                           |
|--------------------------|--------|----------|-------------------------------------------|
| BGfunction               | R      | n (%)    |                                           |
| CrBG = -7.26[Al] + 38.64 | -0.601 | 19 (79%) |                                           |
| CrBG = - 12.9[Ca] + 29.4 | -0.429 | 15 (63%) |                                           |
| CrBG = 0.49[Rb] + 11.83  | 0.722  | 14 (58%) | DISCARDED, possible bi-modal distribution |
| CrBG = - 0.26[Y] + 30.10 | -0.593 | 14 (58%) |                                           |

|       | Cr (F63) | Al (F63) | Cr(F63) - Al | Ca (F63) | Cr(F63) - Ca | Rb (F63) | Cr(F63) - Rb | Y (F63) | Cr(F63) - Y |
|-------|----------|----------|--------------|----------|--------------|----------|--------------|---------|-------------|
| POT01 | 32.28    | 1.39     | 32.28        | 1.10     |              | 25.82    |              | 21.71   |             |
| POT02 | 39.59    | 1.70     |              | 0.31     |              | 28.69    |              | 22.69   |             |
| POT03 | 54.49    | 1.43     |              | 0.48     |              | 21.72    |              | 21.72   |             |
| POT04 | 31.85    | 1.38     | 31.85        | 0.39     |              | 28.09    |              | 21.48   |             |
| POT05 | 38.00    | 1.54     |              | 0.43     |              | 27.60    |              | 21.80   |             |
| POT06 | 27.30    | 1.46     | 27.30        | 0.33     | 27.30        | 33.70    | 27.30        | 19.94   | 27.30       |
| POT07 | 26.50    | 1.15     | 26.50        | 0.37     | 26.50        | 47.00    |              | 12.67   | 26.50       |
| POT08 | 28.87    | 1.20     | 28.87        | 0.22     | 28.87        | 32.63    | 28.87        | 14.07   | 28.87       |
| POT09 | 15.27    | 1.07     |              | 0.20     |              | 26.86    |              | 18.06   |             |
| POT10 | 30.21    | 1.38     | 30.21        | 0.27     |              | 32.68    | 30.21        | 18.43   |             |
| POT11 | 35.21    | 1.49     |              | 0.38     |              | 28.24    |              | 19.56   |             |
| POT12 | 32.55    | 1.48     | 32.55        | 0.39     |              | 32.29    |              | 21.21   |             |
| COR01 | 23.98    | 1.56     | 23.98        | 0.41     | 23.98        | 23.62    | 23.98        | 18.68   | 23.98       |
| COR02 | 24.68    | 1.85     | 24.68        | 0.43     | 24.68        | 24.73    | 24.68        | 21.35   | 24.68       |
| COR03 | 22.59    | 1.71     | 22.59        | 0.33     | 22.59        | 24.80    | 22.59        | 21.28   | 22.59       |
| COR04 | 22.50    | 1.71     | 22.50        | 0.39     | 22.50        | 24.47    | 22.50        | 21.19   | 22.50       |
| COR05 | 26.57    | 1.92     | 26.57        | 0.28     | 26.57        | 24.50    | 26.57        | 21.44   | 26.57       |
| COR06 | 23.37    | 1.96     | 23.37        | 0.30     | 23.37        | 26.88    | 23.37        | 23.37   | 23.37       |
| COR07 | 23.26    | 2.03     | 23.26        | 0.30     | 23.26        | 27.72    | 23.26        | 25.16   | 23.26       |
| COR08 | 25.23    | 1.95     | 25.23        | 0.25     | 25.23        | 26.22    | 25.23        | 20.60   | 25.23       |
| COR09 | 24.39    | 1.85     | 24.39        | 0.30     | 24.39        | 27.01    | 24.39        | 20.69   | 24.39       |
| COR10 | 25.81    | 1.79     | 25.81        | 0.37     | 25.81        | 26.71    | 25.81        | 22.31   | 25.81       |
| COR11 | 28.41    | 1.89     | 28.41        | 0.30     | 28.41        | 25.60    |              | 23.45   |             |
| COR12 | 26.44    | 1.66     | 26.44        | 0.20     | 26.44        | 25.05    | 26.44        | 9.36    | 26.44       |

|         |  |       |       |       |       |
|---------|--|-------|-------|-------|-------|
| Average |  | 26.67 | 25.33 | 25.37 | 25.11 |
| SD      |  | 3.24  | 2.02  | 2.32  | 1.90  |
| RSD     |  | 0.12  | 0.08  | 0.09  | 0.08  |
| 1+RSD   |  | 1.1   | 1.1   | 1.1   | 1.1   |
| 1+2RSD  |  | 1.2   | 1.2   | 1.2   | 1.2   |
| 1+3RSD  |  | 1.4   | 1.2   | 1.3   | 1.2   |

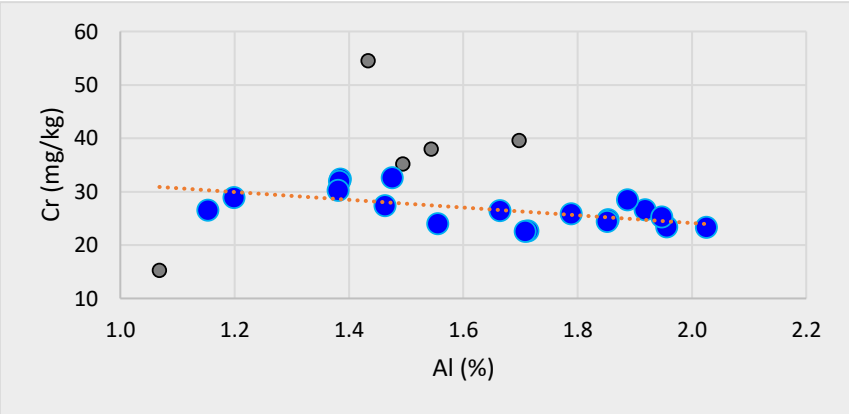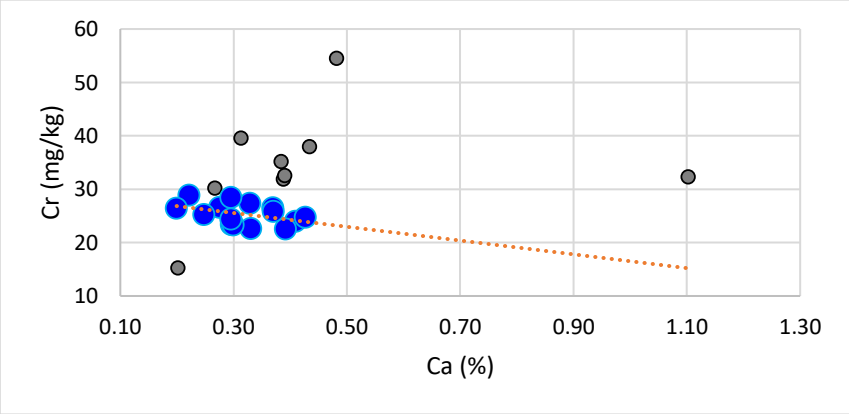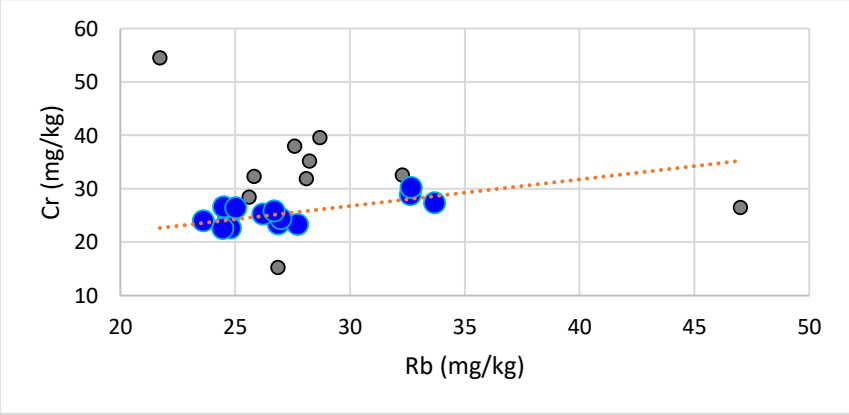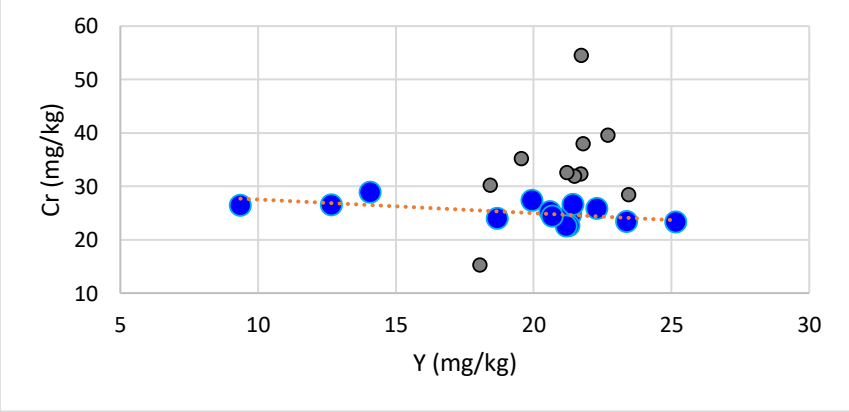

Distinctive Accumulation Patterns of Trace Elements in Sediments of Bedrock Rivers (Miño River, NW Iberian Peninsula)

Álvarez-Vázquez, M.A.; De Uña-Álvarez, E.; Ramírez-Pérez, A.M.; DE Blas, E.; Prego, R.

REGRESSIONS Cu (F2)

|                          |        |          |
|--------------------------|--------|----------|
| BGfunction               | R      | n (%)    |
| CuBG = 32.6[Al] - 136.0  | 0.688  | 17 (71%) |
| CuBG = 168[Ca] + 6       | 0.365  | 13 (54%) |
| CuBG = -0.07[Rb] + 50.24 | -0.347 | 15 (63%) |
| CuBG = -0.95[Y] + 45.16  | -0.952 | 9 (38%)  |

|       | Cu (F2) | Al (F2) | Cu(F2) - Al | Ca (F2) | Cu(F2) - Ca | Rb (F2) | Cu(F2) - Rb | Y (F2) | Cu(F2) - Y |
|-------|---------|---------|-------------|---------|-------------|---------|-------------|--------|------------|
| POT01 | 19.02   | 4.11    | 19.02       | 0.18    | 19.02       | 175.93  | 19.02       | 27.97  | 19.02      |
| POT02 | 30.10   | 5.48    | 30.10       | 0.18    | 30.10       | 169.14  | 30.10       | 14.98  | 30.10      |
| POT03 | 22.33   | 5.14    | 22.33       | 0.14    | 22.33       | 227.69  | 22.33       | 15.00  |            |
| POT04 | 36.85   | 5.83    | 36.85       | 0.16    | 36.85       | 202.67  | 36.85       | 7.41   | 36.85      |
| POT05 | 23.28   | 5.44    | 23.28       | 0.13    | 23.28       | 254.62  | 23.28       | 19.88  | 23.28      |
| POT06 | 96.86   | 6.38    | 96.86       | 0.20    |             | 251.98  |             | 20.90  |            |
| POT07 | 41.60   | 5.21    | 41.60       | 0.13    | 41.60       | 207.41  | 41.60       | 18.94  |            |
| POT08 | 34.88   | 5.82    | 34.88       | 0.17    | 34.88       | 129.66  | 34.88       | 13.16  | 34.88      |
| POT09 | 23.50   | 7.62    |             | 0.23    |             | 336.92  | 23.50       | 21.94  | 23.50      |
| POT10 | 36.76   | 6.06    | 36.76       | 0.18    | 36.76       | 139.31  | 36.76       | 8.94   | 36.76      |
| POT11 | 22.42   | 5.11    | 22.42       | 0.16    | 22.42       | 215.95  | 22.42       | 23.59  | 22.42      |
| POT12 | 91.71   | 6.06    | 91.71       | 0.19    |             | 243.79  |             | 24.86  |            |
| COR01 | 1101.58 | 5.92    |             | 0.24    |             | 244.55  |             | 23.86  |            |
| COR02 | 154.10  | 6.18    |             | 0.23    |             | 230.46  |             | 22.24  |            |
| COR03 | 31.46   | 5.69    | 31.46       | 0.19    | 31.46       | 229.31  | 31.46       | 18.75  | 31.46      |
| COR04 | 146.40  | 6.12    |             | 0.21    |             | 238.09  |             | 20.62  |            |
| COR05 | 326.12  | 5.37    |             | 0.19    |             | 213.60  |             | 31.27  |            |
| COR06 | 53.99   | 5.82    | 53.99       | 0.22    | 53.99       | 199.79  | 53.99       | 15.42  |            |
| COR07 | 48.82   | 5.91    | 48.82       | 0.17    | 48.82       | 275.83  | 48.82       | 23.87  |            |
| COR08 | 80.20   | 6.26    | 80.20       | 0.19    |             | 247.92  |             | 31.15  |            |
| COR09 | 86.02   | 5.84    | 86.02       | 0.23    |             | 138.36  |             | 13.36  |            |
| COR10 | 47.90   | 5.31    | 47.90       | 0.17    | 47.90       | 138.71  | 47.90       | 9.48   |            |
| COR11 | 56.64   | 4.54    |             | 0.13    |             | 138.99  | 56.64       | 6.91   |            |
| COR12 | 111.71  | 5.02    |             | 0.14    |             | 127.16  |             | 3.24   |            |

|         |       |       |       |       |
|---------|-------|-------|-------|-------|
| Average | 47.31 | 34.57 | 35.30 | 28.70 |
| SD      | 25.78 | 11.23 | 12.29 | 6.79  |
| RSD     | 0.54  | 0.32  | 0.35  | 0.24  |
| 1+RSD   | 1.5   | 1.3   | 1.3   | 1.2   |
| 1+2RSD  | 2.1   | 1.6   | 1.7   | 1.5   |
| 1+3RSD  | 2.6   | 2.0   | 2.0   | 1.7   |

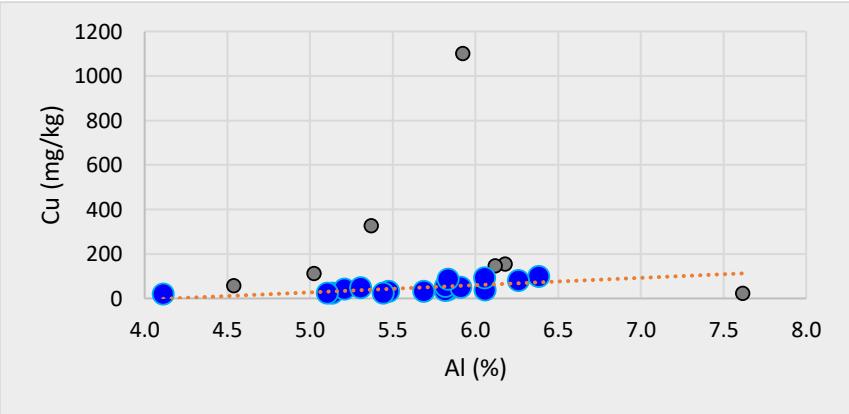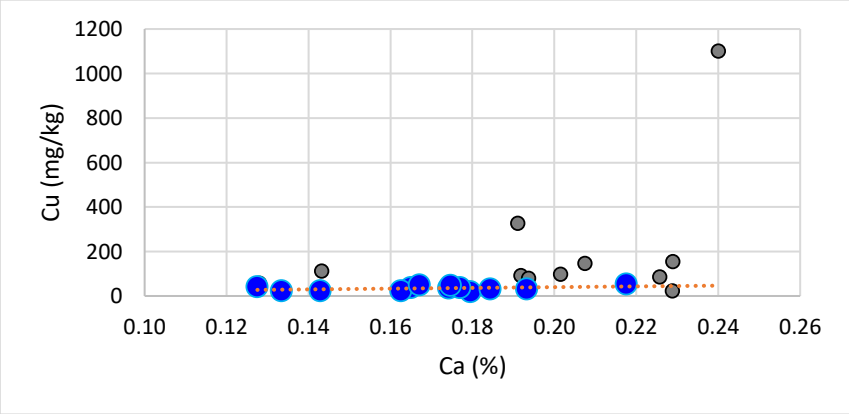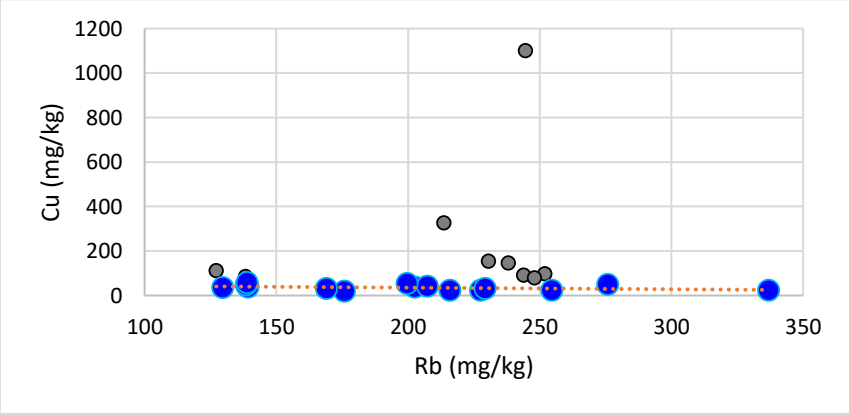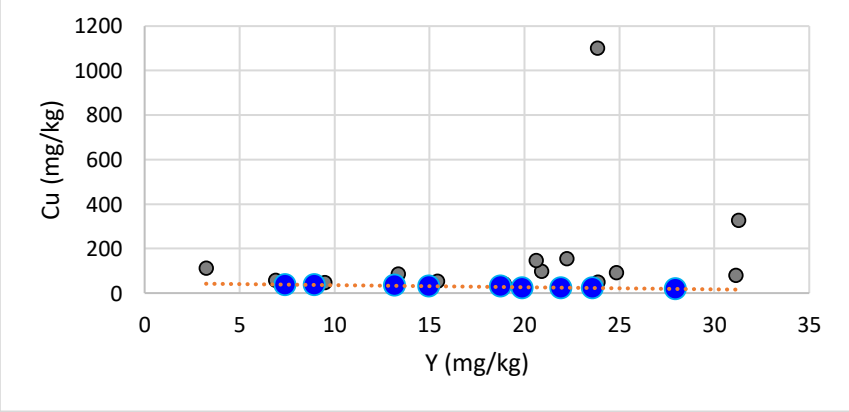



Distinctive Accumulation Patterns of Trace Elements in Sediments of Bedrock Rivers (Miño River, NW Iberian Peninsula)

Álvarez-Vázquez, M.A.; De Uña-Álvarez, E.; Ramírez-Pérez, A.M.; DE Blas, E.; Prego, R.

REGRESSIONS Cu (F63)

|                           |        |          |
|---------------------------|--------|----------|
| BGfunction                | R      | n (%)    |
| CuBG = 91.1[Al] - 59.4    | 0.652  | 20 (83%) |
| CuBG = -23.6[Ca] + 92.3   | -0.114 | 20 (83%) |
| CuBG = -2.82[Rb] + 167.62 | -0.427 | 19 (79%) |
| CuBG = 4.47[Y] - 8.43     | 0.353  | 20 (83%) |

|       | Cu (F63) | Al (F63) | Cu(F63) - Al | Ca (F63) | Cu(F63) - Ca | Rb (F63) | Cu(F63) - Rb | Y (F63) | Cu(F63) - Y |
|-------|----------|----------|--------------|----------|--------------|----------|--------------|---------|-------------|
| POT01 | 50.18    | 1.39     | 50.18        | 1.10     | 50.18        | 25.82    | 50.18        | 21.71   | 50.18       |
| POT02 | 48.54    | 1.70     | 48.54        | 0.31     | 48.54        | 28.69    | 48.54        | 22.69   | 48.54       |
| POT03 | 75.11    | 1.43     | 75.11        | 0.48     | 75.11        | 21.72    | 75.11        | 21.72   | 75.11       |
| POT04 | 85.04    | 1.38     | 85.04        | 0.39     | 85.04        | 28.09    | 85.04        | 21.48   | 85.04       |
| POT05 | 63.60    | 1.54     | 63.60        | 0.43     | 63.60        | 27.60    | 63.60        | 21.80   | 63.60       |
| POT06 | 126.55   | 1.46     | 126.55       | 0.33     | 126.55       | 33.70    | 126.55       | 19.94   | 126.55      |
| POT07 | 48.39    | 1.15     | 48.39        | 0.37     | 48.39        | 47.00    | 48.39        | 12.67   | 48.39       |
| POT08 | 51.31    | 1.20     | 51.31        | 0.22     | 51.31        | 32.63    | 51.31        | 14.07   | 51.31       |
| POT09 | 20.94    | 1.07     | 20.94        | 0.20     | 20.94        | 26.86    |              | 18.06   | 20.94       |
| POT10 | 37.08    | 1.38     | 37.08        | 0.27     | 37.08        | 32.68    | 37.08        | 18.43   | 37.08       |
| POT11 | 53.06    | 1.49     | 53.06        | 0.38     | 53.06        | 28.24    | 53.06        | 19.56   | 53.06       |
| POT12 | 60.77    | 1.48     | 60.77        | 0.39     | 60.77        | 32.29    | 60.77        | 21.21   | 60.77       |
| COR01 | 132.10   | 1.56     | 132.10       | 0.41     | 132.10       | 23.62    | 132.10       | 18.68   | 132.10      |
| COR02 | 115.99   | 1.85     | 115.99       | 0.43     | 115.99       | 24.73    | 115.99       | 21.35   | 115.99      |
| COR03 | 143.64   | 1.71     | 143.64       | 0.33     | 143.64       | 24.80    | 143.64       | 21.28   | 143.64      |
| COR04 | 218.03   | 1.71     |              | 0.39     |              | 24.47    |              | 21.19   |             |
| COR05 | 208.07   | 1.92     |              | 0.28     |              | 24.50    |              | 21.44   |             |
| COR06 | 112.42   | 1.96     | 112.42       | 0.30     | 112.42       | 26.88    | 112.42       | 23.37   | 112.42      |
| COR07 | 84.29    | 2.03     | 84.29        | 0.30     | 84.29        | 27.72    | 84.29        | 25.16   | 84.29       |
| COR08 | 183.19   | 1.95     |              | 0.25     |              | 26.22    |              | 20.60   |             |
| COR09 | 147.63   | 1.85     | 147.63       | 0.30     | 147.63       | 27.01    | 147.63       | 20.69   | 147.63      |
| COR10 | 91.70    | 1.79     | 91.70        | 0.37     | 91.70        | 26.71    | 91.70        | 22.31   | 91.70       |
| COR11 | 117.54   | 1.89     | 117.54       | 0.30     | 117.54       | 25.60    | 117.54       | 23.45   | 117.54      |
| COR12 | 303.03   | 1.66     |              | 0.20     |              | 25.05    |              | 9.36    |             |

|         |       |       |       |       |
|---------|-------|-------|-------|-------|
| Average | 83.29 | 83.29 | 86.58 | 83.29 |
| SD      | 38.15 | 38.15 | 36.17 | 38.15 |
| RSD     | 0.46  | 0.46  | 0.42  | 0.46  |
| 1+RSD   | 1.5   | 1.5   | 1.4   | 1.5   |
| 1+2RSD  | 1.9   | 1.9   | 1.8   | 1.9   |
| 1+3RSD  | 2.4   | 2.4   | 2.3   | 2.4   |

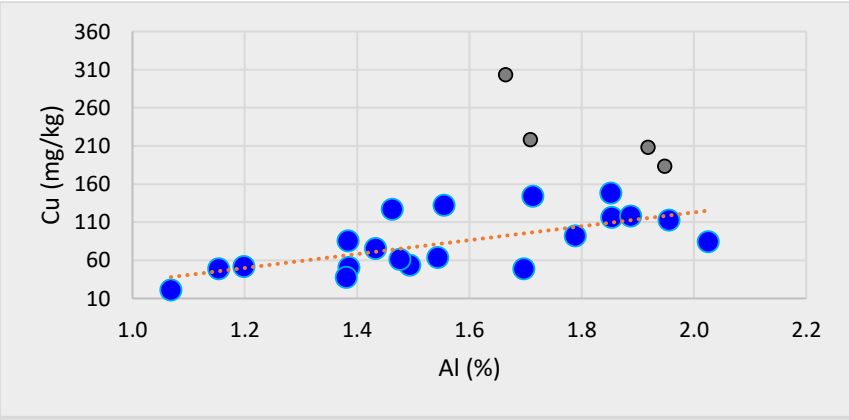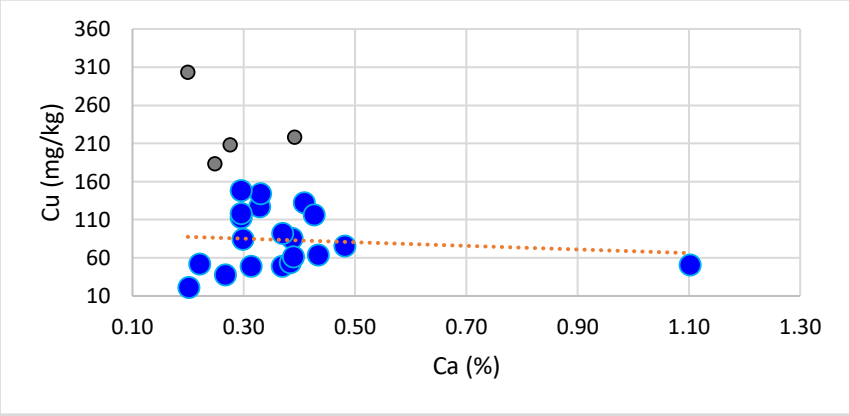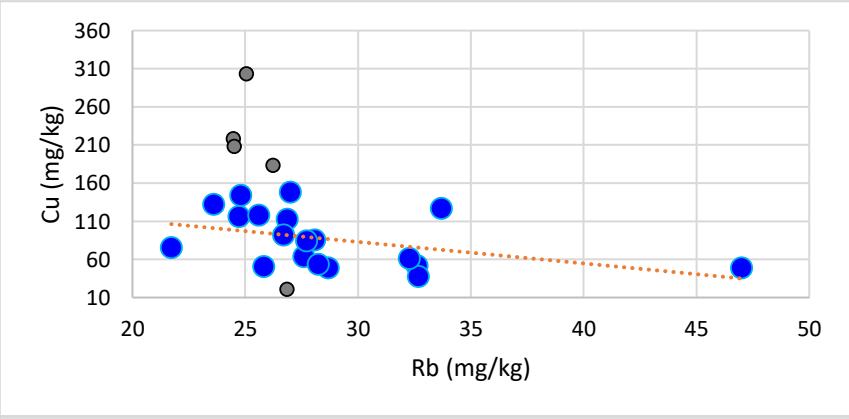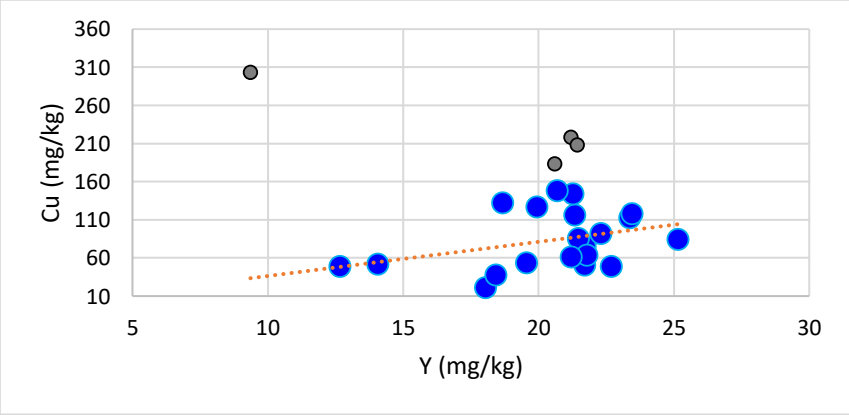

Distinctive Accumulation Patterns of Trace Elements in Sediments of Bedrock Rivers (Miño River, NW Iberian Peninsula)

Álvarez-Vázquez, M.A.; De Uña-Álvarez, E.; Ramírez-Pérez, A.M.; DE Blas, E.; Prego, R.

REGRESSIONS Ni (F2)

|                         |       |          |
|-------------------------|-------|----------|
| BGfunction              | R     | n (%)    |
| NiBG = 1.80[Al] + 13.48 | 0.289 | 21 (88%) |
| NiBG = 67.6[Ca] + 12.0  | 0.525 | 23 (96%) |
| NiBG = 0.04[Rb] + 15.39 | 0.613 | 19 (79%) |
| NiBG = 0.36[Y] + 17.32  | 0.825 | 20 (83%) |

|       | Ni (F2) | Al (F2) | Ni(F2) - Al | Ca (F2) | Ni(F2) - Ca | Rb (F2) | Ni(F2) - Rb | Y (F2) | Ni(F2) - Y |
|-------|---------|---------|-------------|---------|-------------|---------|-------------|--------|------------|
| POT01 | 26.05   | 4.11    | 26.05       | 0.18    | 26.05       | 175.93  | 26.05       | 27.97  | 26.05      |
| POT02 | 23.49   | 5.48    | 23.49       | 0.18    | 23.49       | 169.14  | 23.49       | 14.98  | 23.49      |
| POT03 | 25.40   | 5.14    | 25.40       | 0.14    | 25.40       | 227.69  | 25.40       | 15.00  | 25.40      |
| POT04 | 21.85   | 5.83    | 21.85       | 0.16    | 21.85       | 202.67  | 21.85       | 7.41   | 21.85      |
| POT05 | 21.77   | 5.44    | 21.77       | 0.13    | 21.77       | 254.62  | 21.77       | 19.88  | 21.77      |
| POT06 | 23.21   | 6.38    | 23.21       | 0.20    | 23.21       | 251.98  | 23.21       | 20.90  | 23.21      |
| POT07 | 17.19   | 5.21    | 17.19       | 0.13    | 17.19       | 207.41  |             | 18.94  |            |
| POT08 | 20.86   | 5.82    | 20.86       | 0.17    | 20.86       | 129.66  | 20.86       | 13.16  | 20.86      |
| POT09 | 14.35   | 7.62    |             | 0.23    |             | 336.92  |             | 21.94  |            |
| POT10 | 21.11   | 6.06    | 21.11       | 0.18    | 21.11       | 139.31  | 21.11       | 8.94   | 21.11      |
| POT11 | 25.62   | 5.11    | 25.62       | 0.16    | 25.62       | 215.95  | 25.62       | 23.59  | 25.62      |
| POT12 | 28.68   | 6.06    | 28.68       | 0.19    | 28.68       | 243.79  | 28.68       | 24.86  | 28.68      |
| COR01 | 22.64   | 5.92    | 22.64       | 0.24    | 22.64       | 244.55  | 22.64       | 23.86  | 22.64      |
| COR02 | 32.44   | 6.18    |             | 0.23    | 32.44       | 230.46  |             | 22.24  |            |
| COR03 | 21.32   | 5.69    | 21.32       | 0.19    | 21.32       | 229.31  | 21.32       | 18.75  | 21.32      |
| COR04 | 26.51   | 6.12    | 26.51       | 0.21    | 26.51       | 238.09  | 26.51       | 20.62  | 26.51      |
| COR05 | 30.46   | 5.37    |             | 0.19    | 30.46       | 213.60  |             | 31.27  | 30.46      |
| COR06 | 25.96   | 5.82    | 25.96       | 0.22    | 25.96       | 199.79  | 25.96       | 15.42  | 25.96      |
| COR07 | 26.35   | 5.91    | 26.35       | 0.17    | 26.35       | 275.83  | 26.35       | 23.87  | 26.35      |
| COR08 | 29.33   | 6.26    | 29.33       | 0.19    | 29.33       | 247.92  | 29.33       | 31.15  | 29.33      |
| COR09 | 22.81   | 5.84    | 22.81       | 0.23    | 22.81       | 138.36  | 22.81       | 13.36  | 22.81      |
| COR10 | 28.42   | 5.31    | 28.42       | 0.17    | 28.42       | 138.71  |             | 9.48   |            |
| COR11 | 16.80   | 4.54    | 16.80       | 0.13    | 16.80       | 138.99  | 16.80       | 6.91   | 16.80      |
| COR12 | 18.67   | 5.02    | 18.67       | 0.14    | 18.67       | 127.16  | 18.67       | 3.24   | 18.67      |

|         |       |       |       |       |
|---------|-------|-------|-------|-------|
| Average | 23.52 | 24.21 | 23.60 | 23.94 |
| SD      | 3.57  | 4.11  | 3.26  | 3.52  |
| RSD     | 0.15  | 0.17  | 0.14  | 0.15  |
| 1+RSD   | 1.2   | 1.2   | 1.1   | 1.1   |
| 1+2RSD  | 1.3   | 1.3   | 1.3   | 1.3   |
| 1+3RSD  | 1.5   | 1.5   | 1.4   | 1.4   |

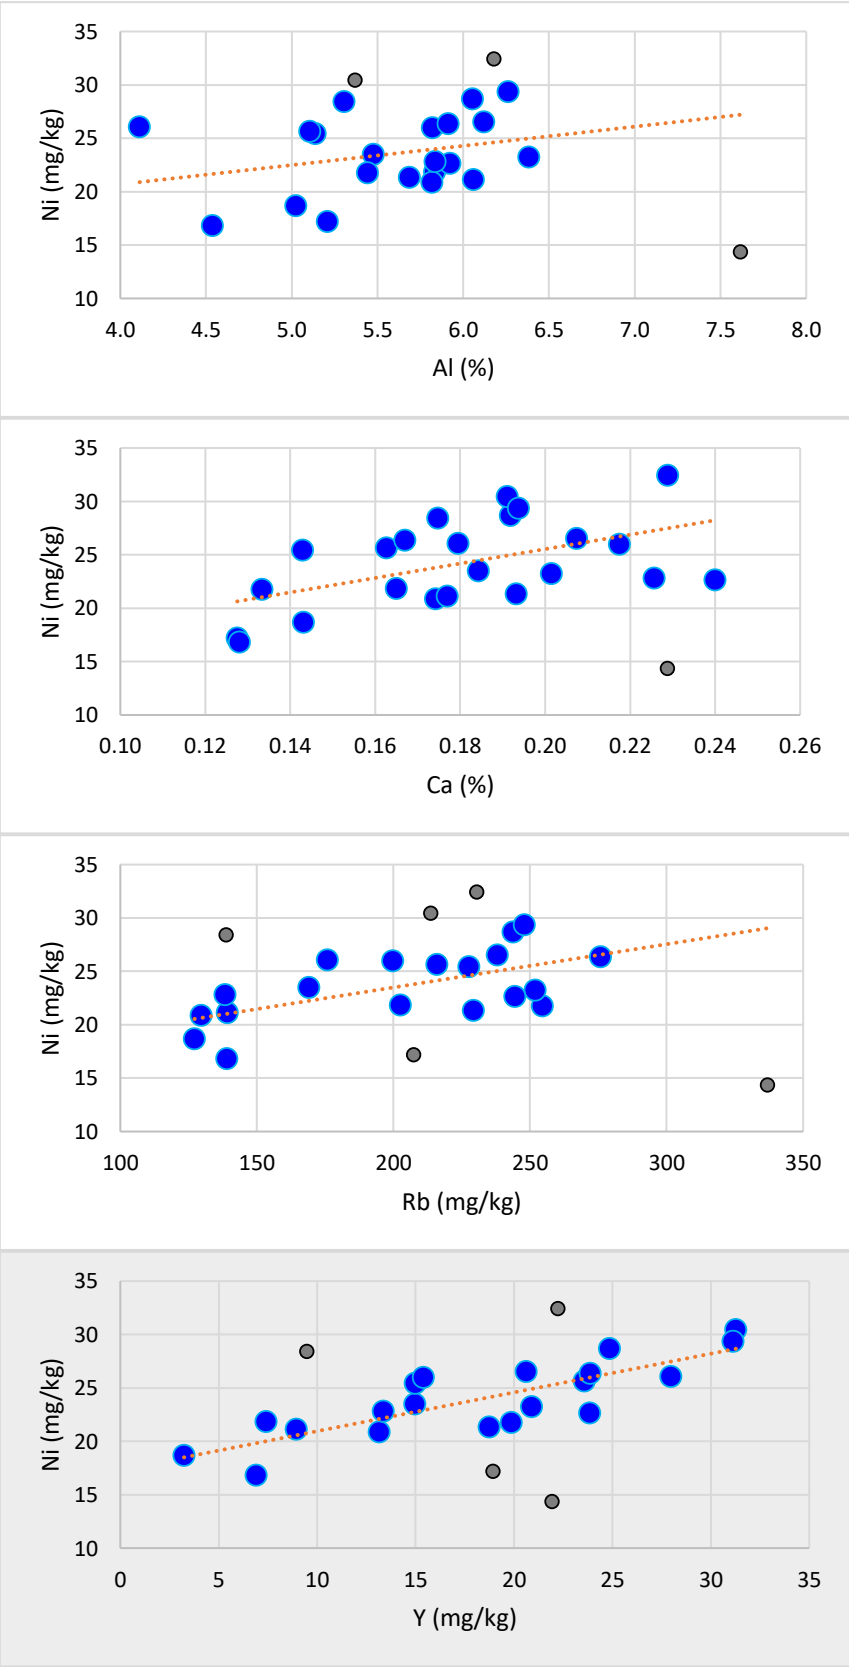

Distinctive Accumulation Patterns of Trace Elements in Sediments of Bedrock Rivers (Miño River, NW Iberian Peninsula)

Álvarez-Vázquez, M.A.; De Uña-Álvarez, E.; Ramírez-Pérez, A.M.; DE Blas, E.; Prego, R.

REGRESSIONS Ni (F63)

|                           |        |          |
|---------------------------|--------|----------|
| BGfunction                | R      | n (%)    |
| NiBG = 73.5[Al] - 15.14   | 0.867  | 15 (63%) |
| NiBG = 311[Ca] + 16       | 0.733  | 19 (79%) |
| NiBG = -2.94[Rb] + 198.61 | -0.812 | 16 (66%) |
| NiBG = 5.91[Y] - 13.52    | 0.977  | 14 (58%) |

|       | Ni (F63) | Al (F63) | Ni(F63) - Al | Ca (F63) | Ni(F63) - Ca | Rb (F63) | Ni(F63) - Rb | Y (F63) | Ni(F63) - Y |
|-------|----------|----------|--------------|----------|--------------|----------|--------------|---------|-------------|
| POT01 | 217.14   | 1.39     |              | 1.10     |              | 25.82    |              | 21.71   |             |
| POT02 | 122.60   | 1.70     | 122.60       | 0.31     | 122.60       | 28.69    | 122.60       | 22.69   | 122.60      |
| POT03 | 276.88   | 1.43     |              | 0.48     |              | 21.72    |              | 21.72   |             |
| POT04 | 144.53   | 1.38     |              | 0.39     | 144.53       | 28.09    |              | 21.48   |             |
| POT05 | 213.80   | 1.54     |              | 0.43     |              | 27.60    |              | 21.80   |             |
| POT06 | 93.19    | 1.46     | 93.19        | 0.33     | 93.19        | 33.70    | 93.19        | 19.94   | 93.19       |
| POT07 | 59.91    | 1.15     | 59.91        | 0.37     |              | 47.00    | 59.91        | 12.67   | 59.91       |
| POT08 | 68.29    | 1.20     | 68.29        | 0.22     | 68.29        | 32.63    |              | 14.07   | 68.29       |
| POT09 | 33.48    | 1.07     |              | 0.20     |              | 26.86    |              | 18.06   |             |
| POT10 | 91.39    | 1.38     | 91.39        | 0.27     | 91.39        | 32.68    | 91.39        | 18.43   | 91.39       |
| POT11 | 132.03   | 1.49     |              | 0.38     | 132.03       | 28.24    | 132.03       | 19.56   |             |
| POT12 | 168.37   | 1.48     |              | 0.39     | 168.37       | 32.29    |              | 21.21   |             |
| COR01 | 130.45   | 1.56     |              | 0.41     | 130.45       | 23.62    | 130.45       | 18.68   |             |
| COR02 | 130.77   | 1.85     | 130.77       | 0.43     | 130.77       | 24.73    | 130.77       | 21.35   |             |
| COR03 | 120.25   | 1.71     | 120.25       | 0.33     | 120.25       | 24.80    | 120.25       | 21.28   | 120.25      |
| COR04 | 108.10   | 1.71     | 108.10       | 0.39     | 108.10       | 24.47    | 108.10       | 21.19   | 108.10      |
| COR05 | 110.44   | 1.92     | 110.44       | 0.28     | 110.44       | 24.50    | 110.44       | 21.44   | 110.44      |
| COR06 | 128.32   | 1.96     | 128.32       | 0.30     | 128.32       | 26.88    | 128.32       | 23.37   | 128.32      |
| COR07 | 130.23   | 2.03     | 130.23       | 0.30     | 130.23       | 27.72    | 130.23       | 25.16   | 130.23      |
| COR08 | 108.06   | 1.95     | 108.06       | 0.25     | 108.06       | 26.22    | 108.06       | 20.60   | 108.06      |
| COR09 | 106.91   | 1.85     | 106.91       | 0.30     | 106.91       | 27.01    | 106.91       | 20.69   | 106.91      |
| COR10 | 136.72   | 1.79     | 136.72       | 0.37     | 136.72       | 26.71    | 136.72       | 22.31   |             |
| COR11 | 136.70   | 1.89     | 136.70       | 0.30     | 136.70       | 25.60    | 136.70       | 23.45   | 136.70      |
| COR12 | 47.35    | 1.66     |              | 0.20     | 47.35        | 25.05    |              | 9.36    | 47.35       |

|         |        |        |        |        |
|---------|--------|--------|--------|--------|
| Average | 110.13 | 116.56 | 115.38 | 102.27 |
| SD      | 23.55  | 27.75  | 20.76  | 27.32  |
| RSD     | 0.21   | 0.24   | 0.18   | 0.27   |
| 1+RSD   | 1.2    | 1.2    | 1.2    | 1.3    |
| 1+2RSD  | 1.4    | 1.5    | 1.4    | 1.5    |
| 1+3RSD  | 1.6    | 1.7    | 1.5    | 1.8    |

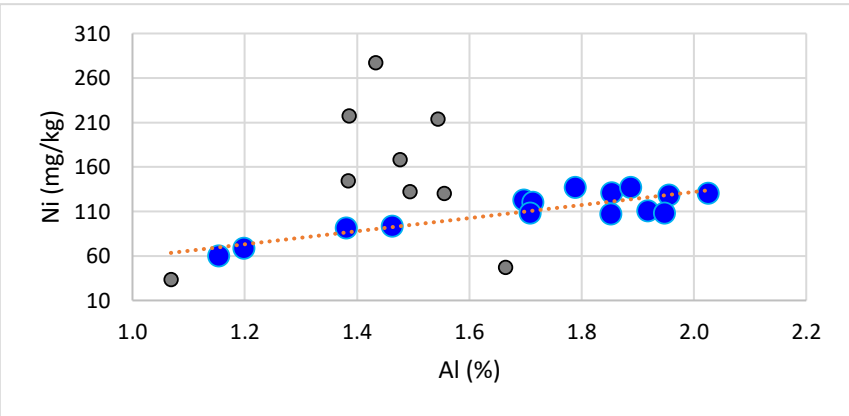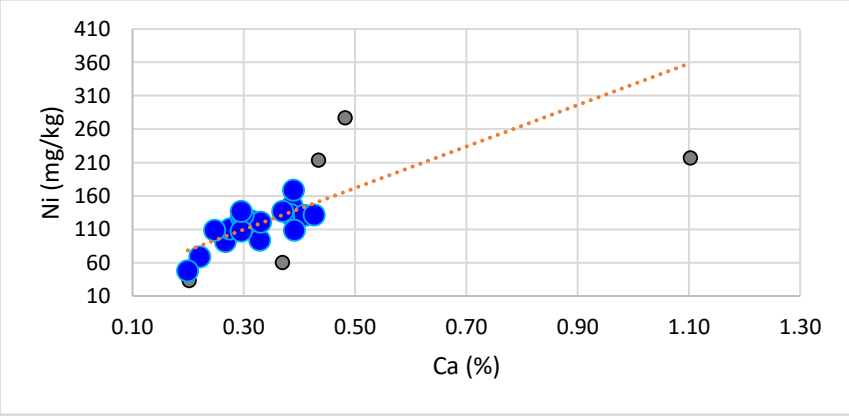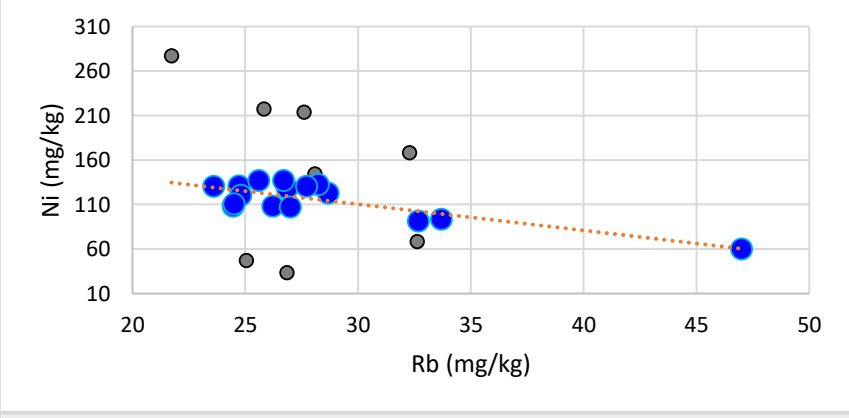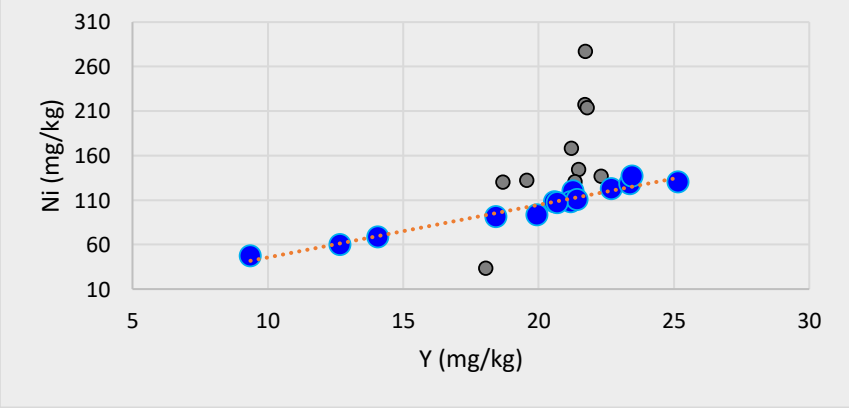



Distinctive Accumulation Patterns of Trace Elements in Sediments of Bedrock Rivers (Miño River, NW Iberian Peninsula)

Álvarez-Vázquez, M.A.; De Uña-Álvarez, E.; Ramírez-Pérez, A.M.; DE Blas, E.; Prego, R.

REGRESSIONS Pb (F2)

|                         |       |          |
|-------------------------|-------|----------|
| BGfunction              | R     | n (%)    |
| PbBG = 10.4[Al] - 15.7  | 0.516 | 17 (71%) |
| PbBG = 324[Ca] - 11     | 0.746 | 18 (75%) |
| PbBG = 0.01[Rb] + 37.60 | 0.076 | 17 (71%) |
| PbBG = 0.73[Y] + 30.24  | 0.438 | 17 (71%) |

|       | Pb (F2) | Al (F2) | Pb(F2) - Al | Ca (F2) | Pb(F2) - Ca | Rb (F2) | Pb(F2) - Rb | Y (F2) | Pb(F2) - Y |
|-------|---------|---------|-------------|---------|-------------|---------|-------------|--------|------------|
| POT01 | 24.27   | 4.11    | 24.27       | 0.18    |             | 175.93  | 24.27       | 27.97  |            |
| POT02 | 51.19   | 5.48    | 51.19       | 0.18    | 51.19       | 169.14  | 51.19       | 14.98  | 51.19      |
| POT03 | 35.82   | 5.14    | 35.82       | 0.14    | 35.82       | 227.69  | 35.82       | 15.00  | 35.82      |
| POT04 | 28.46   | 5.83    | 28.46       | 0.16    | 28.46       | 202.67  | 28.46       | 7.41   | 28.46      |
| POT05 | 35.88   | 5.44    | 35.88       | 0.13    | 35.88       | 254.62  | 35.88       | 19.88  | 35.88      |
| POT06 | 60.10   | 6.38    | 60.10       | 0.20    | 60.10       | 251.98  | 60.10       | 20.90  | 60.10      |
| POT07 | 40.25   | 5.21    | 40.25       | 0.13    | 40.25       | 207.41  | 40.25       | 18.94  | 40.25      |
| POT08 | 27.83   | 5.82    | 27.83       | 0.17    | 27.83       | 129.66  | 27.83       | 13.16  | 27.83      |
| POT09 | 33.67   | 7.62    |             | 0.23    |             | 336.92  | 33.67       | 21.94  | 33.67      |
| POT10 | 31.10   | 6.06    | 31.10       | 0.18    | 31.10       | 139.31  | 31.10       | 8.94   | 31.10      |
| POT11 | 32.60   | 5.11    | 32.60       | 0.16    | 32.60       | 215.95  | 32.60       | 23.59  | 32.60      |
| POT12 | 51.46   | 6.06    | 51.46       | 0.19    | 51.46       | 243.79  | 51.46       | 24.86  | 51.46      |
| COR01 | 70.89   | 5.92    |             | 0.24    | 70.89       | 244.55  |             | 23.86  |            |
| COR02 | 74.26   | 6.18    |             | 0.23    | 74.26       | 230.46  |             | 22.24  |            |
| COR03 | 55.44   | 5.69    | 55.44       | 0.19    | 55.44       | 229.31  | 55.44       | 18.75  | 55.44      |
| COR04 | 190.85  | 6.12    |             | 0.21    |             | 238.09  |             | 20.62  |            |
| COR05 | 366.95  | 5.37    |             | 0.19    |             | 213.60  |             | 31.27  |            |
| COR06 | 132.82  | 5.82    |             | 0.22    |             | 199.79  |             | 15.42  |            |
| COR07 | 39.35   | 5.91    | 39.35       | 0.17    | 39.35       | 275.83  | 39.35       | 23.87  | 39.35      |
| COR08 | 65.44   | 6.26    | 65.44       | 0.19    | 65.44       | 247.92  |             | 31.15  | 65.44      |
| COR09 | 50.32   | 5.84    | 50.32       | 0.23    | 50.32       | 138.36  | 50.32       | 13.36  | 50.32      |
| COR10 | 50.38   | 5.31    | 50.38       | 0.17    | 50.38       | 138.71  | 50.38       | 9.48   | 50.38      |
| COR11 | 39.28   | 4.54    | 39.28       | 0.13    | 39.28       | 138.99  | 39.28       | 6.91   | 39.28      |
| COR12 | 248.46  | 5.02    |             | 0.14    |             | 127.16  |             | 3.24   |            |

|         |       |       |       |       |
|---------|-------|-------|-------|-------|
| Average | 42.30 | 46.67 | 40.43 | 42.86 |
| SD      | 12.17 | 14.43 | 10.75 | 11.49 |
| RSD     | 0.29  | 0.31  | 0.27  | 0.27  |
| 1+RSD   | 1.3   | 1.3   | 1.3   | 1.3   |
| 1+2RSD  | 1.6   | 1.6   | 1.5   | 1.5   |
| 1+3RSD  | 1.9   | 1.9   | 1.8   | 1.8   |

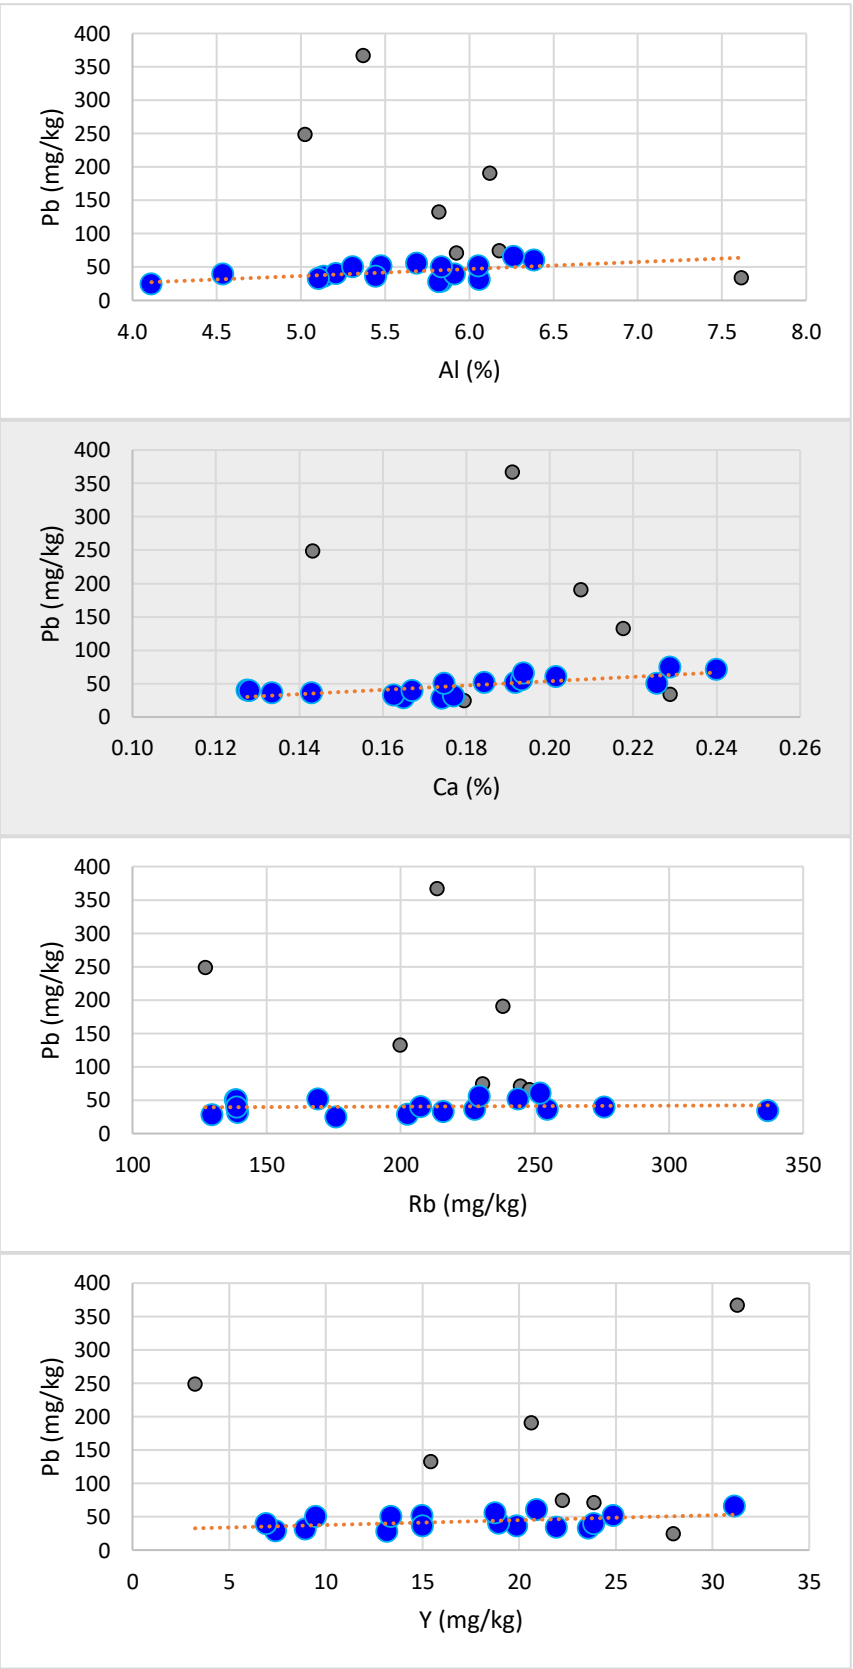

Distinctive Accumulation Patterns of Trace Elements in Sediments of Bedrock Rivers (Miño River, NW Iberian Peninsula)

Álvarez-Vázquez, M.A.; De Uña-Álvarez, E.; Ramírez-Pérez, A.M.; DE Blas, E.; Prego, R.

REGRESSIONS Pb (F63)

|                           |        |          |
|---------------------------|--------|----------|
| BGfunction                | R      | n (%)    |
| PbBG = 141[Al] - 134      | 0.815  | 18 (75%) |
| PbBG = 75.7[Ca] + 52.1    | 0.311  | 20 (83%) |
| PbBG = -3.03[Rb] + 171.18 | -0.336 | 21 (88%) |
| PbBG = 5.96[Y] - 38.21    | 0.295  | 20 (83%) |

|       | Pb (F63) | Al (F63) | Pb(F63) - Al | Ca (F63) | Pb(F63) - Ca | Rb (F63) | Pb(F63) - Rb | Y (F63) | Pb(F63) - Y |
|-------|----------|----------|--------------|----------|--------------|----------|--------------|---------|-------------|
| POT01 | 133.22   | 1.39     |              | 1.10     | 133.22       | 25.82    | 133.22       | 21.71   | 133.22      |
| POT02 | 28.03    | 1.70     |              | 0.31     | 28.03        | 28.69    | 28.03        | 22.69   | 28.03       |
| POT03 | 59.65    | 1.43     | 59.65        | 0.48     | 59.65        | 21.72    | 59.65        | 21.72   | 59.65       |
| POT04 | 43.27    | 1.38     | 43.27        | 0.39     | 43.27        | 28.09    | 43.27        | 21.48   | 43.27       |
| POT05 | 38.00    | 1.54     | 38.00        | 0.43     | 38.00        | 27.60    | 38.00        | 21.80   | 38.00       |
| POT06 | 116.23   | 1.46     | 116.23       | 0.33     | 116.23       | 33.70    | 116.23       | 19.94   | 116.23      |
| POT07 | 55.30    | 1.15     | 55.30        | 0.37     | 55.30        | 47.00    | 55.30        | 12.67   |             |
| POT08 | 28.51    | 1.20     | 28.51        | 0.22     | 28.51        | 32.63    | 28.51        | 14.07   | 28.51       |
| POT09 | 23.47    | 1.07     | 23.47        | 0.20     | 23.47        | 26.86    | 23.47        | 18.06   | 23.47       |
| POT10 | 33.20    | 1.38     | 33.20        | 0.27     | 33.20        | 32.68    | 33.20        | 18.43   | 33.20       |
| POT11 | 28.36    | 1.49     | 28.36        | 0.38     | 28.36        | 28.24    | 28.36        | 19.56   | 28.36       |
| POT12 | 81.28    | 1.48     | 81.28        | 0.39     | 81.28        | 32.29    | 81.28        | 21.21   | 81.28       |
| COR01 | 119.39   | 1.56     | 119.39       | 0.41     | 119.39       | 23.62    | 119.39       | 18.68   | 119.39      |
| COR02 | 135.85   | 1.85     | 135.85       | 0.43     | 135.85       | 24.73    | 135.85       | 21.35   | 135.85      |
| COR03 | 150.94   | 1.71     | 150.94       | 0.33     | 150.94       | 24.80    | 150.94       | 21.28   | 150.94      |
| COR04 | 230.16   | 1.71     |              | 0.39     |              | 24.47    |              | 21.19   |             |
| COR05 | 203.54   | 1.92     |              | 0.28     |              | 24.50    |              | 21.44   |             |
| COR06 | 123.93   | 1.96     | 123.93       | 0.30     | 123.93       | 26.88    | 123.93       | 23.37   | 123.93      |
| COR07 | 68.34    | 2.03     |              | 0.30     | 68.34        | 27.72    | 68.34        | 25.16   | 68.34       |
| COR08 | 163.89   | 1.95     | 163.89       | 0.25     |              | 26.22    | 163.89       | 20.60   | 163.89      |
| COR09 | 136.21   | 1.85     | 136.21       | 0.30     | 136.21       | 27.01    | 136.21       | 20.69   | 136.21      |
| COR10 | 102.09   | 1.79     | 102.09       | 0.37     | 102.09       | 26.71    | 102.09       | 22.31   | 102.09      |
| COR11 | 112.31   | 1.89     | 112.31       | 0.30     | 112.31       | 25.60    | 112.31       | 23.45   | 112.31      |
| COR12 | 3030.73  | 1.66     |              | 0.20     |              | 25.05    |              | 9.36    |             |

|         |       |       |       |       |
|---------|-------|-------|-------|-------|
| Average | 86.21 | 80.88 | 84.83 | 86.31 |
| SD      | 47.79 | 44.80 | 47.27 | 48.00 |
| RSD     | 0.55  | 0.55  | 0.56  | 0.56  |
| 1+RSD   | 1.6   | 1.6   | 1.6   | 1.6   |
| 1+2RSD  | 2.1   | 2.1   | 2.1   | 2.1   |
| 1+3RSD  | 2.7   | 2.7   | 2.7   | 2.7   |

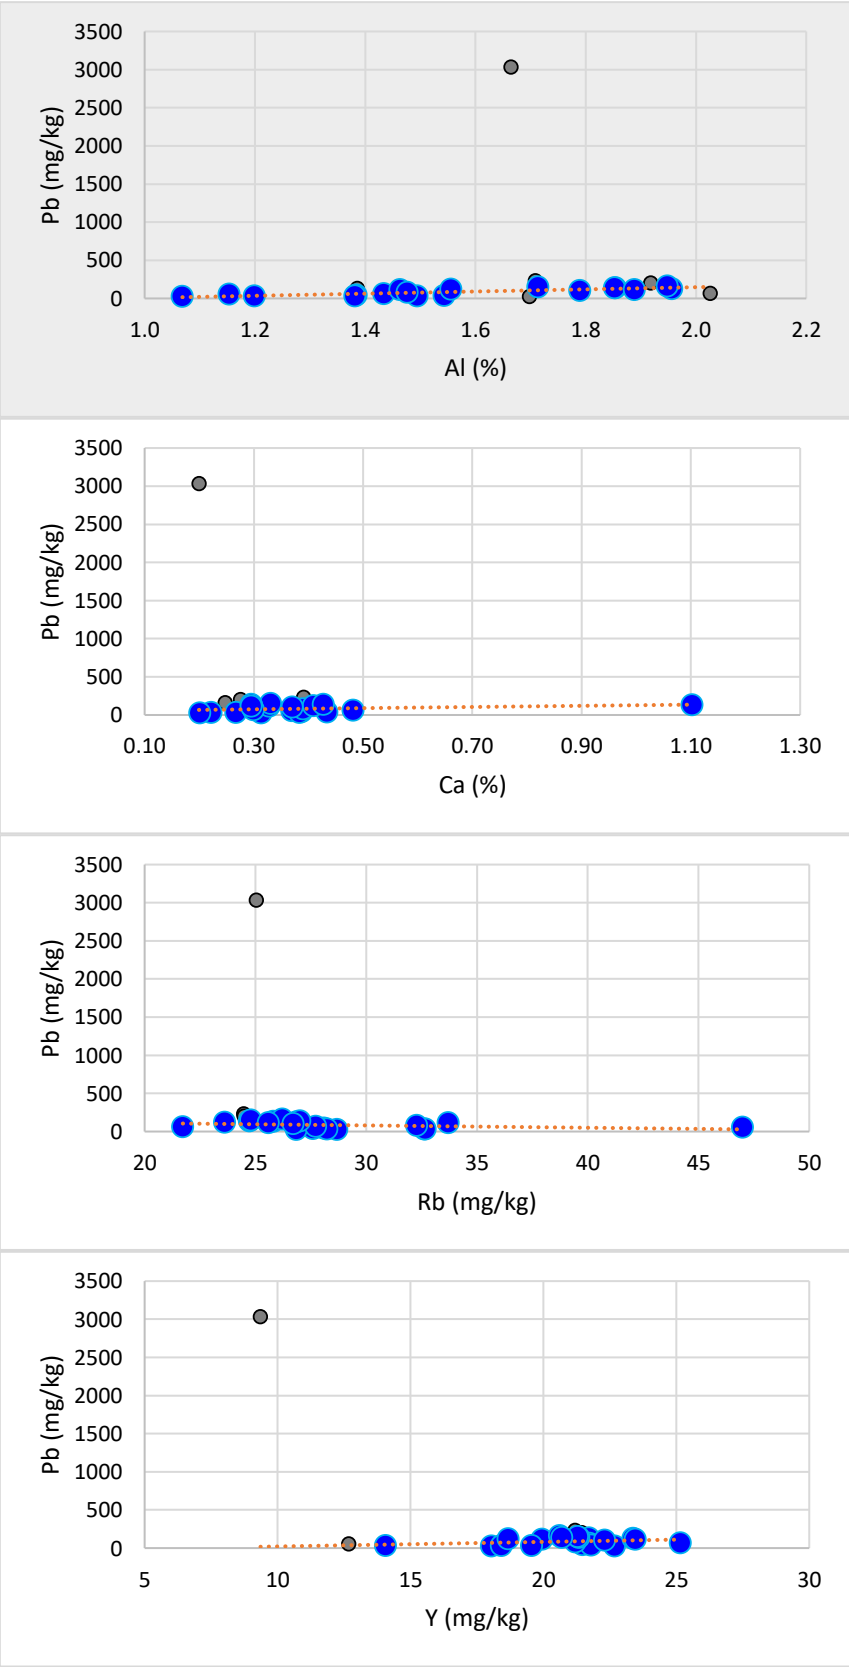

Distinctive Accumulation Patterns of Trace Elements in Sediments of Bedrock Rivers (Miño River, NW Iberian Peninsula)

Álvarez-Vázquez, M.A.; De Uña-Álvarez, E.; Ramírez-Pérez, A.M.; DE Blas, E.; Prego, R.

REGRESSIONS Zn (F2)

|                         |       |          |
|-------------------------|-------|----------|
| BGfunction              | R     | n (%)    |
| ZnBG = 27.4[Al] - 56.2  | 0.457 | 19 (79%) |
| ZnBG = 964[Ca] - 70     | 0.764 | 20 (83%) |
| ZnBG = 0.01[Rb] + 92.21 | 0.015 | 20 (83%) |
| ZnBG = 1.24[Y] + 69.58  | 0.292 | 19 (79%) |

|       | Zn (F2) | Al (F2) | Zn(F2) - Al | Ca (F2) | Zn(F2) - Ca | Rb (F2) | Zn(F2) - Rb | Y (F2) | Zn(F2) - Y |
|-------|---------|---------|-------------|---------|-------------|---------|-------------|--------|------------|
| POT01 | 82.28   | 4.11    | 82.28       | 0.18    | 82.28       | 175.93  | 82.28       | 27.97  | 82.28      |
| POT02 | 69.12   | 5.48    | 69.12       | 0.18    | 69.12       | 169.14  | 69.12       | 14.98  | 69.12      |
| POT03 | 59.54   | 5.14    | 59.54       | 0.14    | 59.54       | 227.69  | 59.54       | 15.00  | 59.54      |
| POT04 | 67.88   | 5.83    | 67.88       | 0.16    | 67.88       | 202.67  | 67.88       | 7.41   | 67.88      |
| POT05 | 49.25   | 5.44    | 49.25       | 0.13    | 49.25       | 254.62  | 49.25       | 19.88  | 49.25      |
| POT06 | 150.18  | 6.38    | 150.18      | 0.20    | 150.18      | 251.98  | 150.18      | 20.90  | 150.18     |
| POT07 | 69.19   | 5.21    | 69.19       | 0.13    | 69.19       | 207.41  | 69.19       | 18.94  | 69.19      |
| POT08 | 73.32   | 5.82    | 73.32       | 0.17    | 73.32       | 129.66  | 73.32       | 13.16  | 73.32      |
| POT09 | 67.74   | 7.62    | 67.74       | 0.23    | 67.74       | 336.92  | 67.74       | 21.94  | 67.74      |
| POT10 | 64.91   | 6.06    | 64.91       | 0.18    | 64.91       | 139.31  | 64.91       | 8.94   | 64.91      |
| POT11 | 63.32   | 5.11    | 63.32       | 0.16    | 63.32       | 215.95  | 63.32       | 23.59  | 63.32      |
| POT12 | 150.78  | 6.06    | 150.78      | 0.19    | 150.78      | 243.79  | 150.78      | 24.86  | 150.78     |
| COR01 | 188.39  | 5.92    | 188.39      | 0.24    | 188.39      | 244.55  | 188.39      | 23.86  | 188.39     |
| COR02 | 235.51  | 6.18    | 235.51      | 0.23    | 235.51      | 230.46  | 235.51      | 22.24  | 235.51     |
| COR03 | 133.32  | 5.69    | 133.32      | 0.19    | 133.32      | 229.31  | 133.32      | 18.75  | 133.32     |
| COR04 | 207.33  | 6.12    | 207.33      | 0.21    | 207.33      | 238.09  | 207.33      | 20.62  | 207.33     |
| COR05 | 226.04  | 5.37    | 226.04      | 0.19    | 226.04      | 213.60  | 226.04      | 31.27  | 226.04     |
| COR06 | 109.11  | 5.82    | 109.11      | 0.22    | 109.11      | 199.79  | 109.11      | 15.42  | 109.11     |
| COR07 | 83.19   | 5.91    | 83.19       | 0.17    | 83.19       | 275.83  | 83.19       | 23.87  | 83.19      |
| COR08 | 145.18  | 6.26    | 145.18      | 0.19    | 145.18      | 247.92  | 145.18      | 31.15  | 145.18     |
| COR09 | 152.68  | 5.84    | 152.68      | 0.23    | 152.68      | 138.36  | 152.68      | 13.36  | 152.68     |
| COR10 | 96.15   | 5.31    | 96.15       | 0.17    | 96.15       | 138.71  | 96.15       | 9.48   | 96.15      |
| COR11 | 87.31   | 4.54    | 87.31       | 0.13    | 87.31       | 138.99  | 87.31       | 6.91   | 87.31      |
| COR12 | 105.37  | 5.02    | 105.37      | 0.14    | 105.37      | 127.16  | 105.37      | 3.24   | 105.37     |

|         |       |        |       |       |
|---------|-------|--------|-------|-------|
| Average | 95.37 | 100.02 | 93.99 | 90.90 |
| SD      | 34.91 | 39.84  | 34.54 | 32.52 |
| RSD     | 0.37  | 0.40   | 0.37  | 0.36  |
| 1+RSD   | 1.4   | 1.4    | 1.4   | 1.4   |
| 1+2RSD  | 1.7   | 1.8    | 1.7   | 1.7   |
| 1+3RSD  | 2.1   | 2.2    | 2.1   | 2.1   |

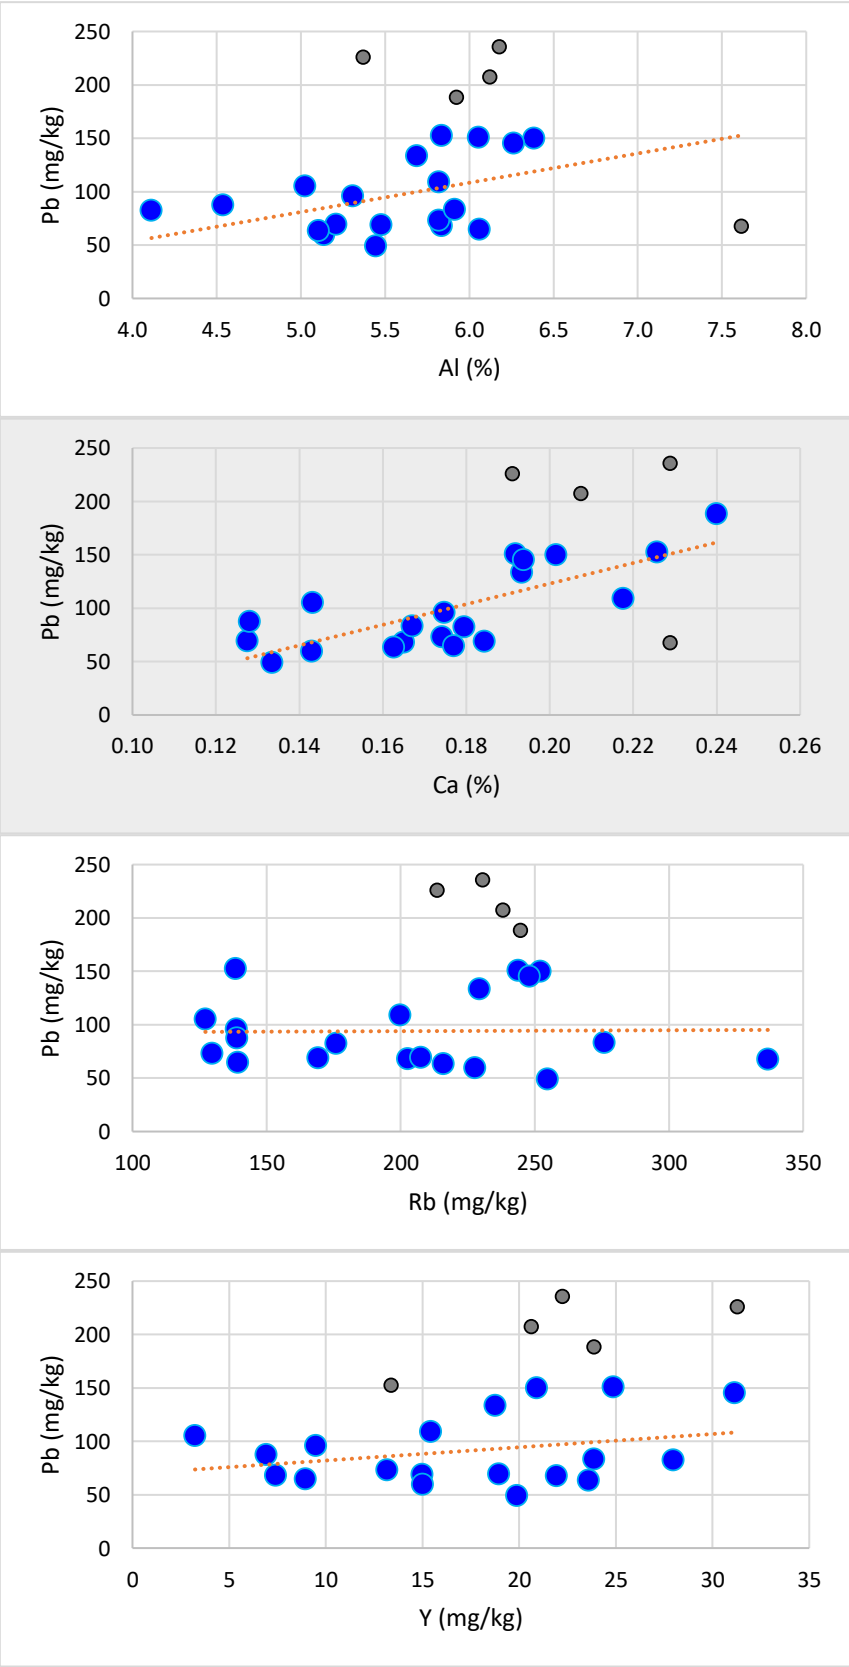

Distinctive Accumulation Patterns of Trace Elements in Sediments of Bedrock Rivers (Miño River, NW Iberian Peninsula)

Álvarez-Vázquez, M.A.; De Uña-Álvarez, E.; Ramírez-Pérez, A.M.; DE Blas, E.; Prego, R.

REGRESSIONS Zn (F63)

|                           |        |          |                                           |
|---------------------------|--------|----------|-------------------------------------------|
| BGfunction                | R      | n (%)    |                                           |
| ZnBG = -23.1[Al] + 376.5  | -0.169 | 14 (58%) |                                           |
| ZnBG = 641[Ca] + 121      | 0.736  | 20 (83%) |                                           |
| ZnBG = -3.73[Rb] + 422.03 | -0.602 | 12 (50%) |                                           |
| ZnBG = 13.3[Y] + 56.9     | 0.840  | 19 (79%) | DISCARDED, possible bi-modal distribution |

|       | Zn (F63) | Al (F63) | Zn(F63) - Al | Ca (F63) | Zn(F63) - Ca | Rb (F63) | Zn(F63) - Rb | Y (F63) | Zn(F63) - Y |
|-------|----------|----------|--------------|----------|--------------|----------|--------------|---------|-------------|
| POT01 | 451.88   | 1.39     |              | 1.10     |              | 25.82    |              | 21.71   |             |
| POT02 | 375.22   | 1.70     | 375.22       | 0.31     | 375.22       | 28.69    |              | 22.69   | 375.22      |
| POT03 | 526.51   | 1.43     |              | 0.48     |              | 21.72    |              | 21.72   |             |
| POT04 | 399.64   | 1.38     |              | 0.39     | 399.64       | 28.09    |              | 21.48   | 399.64      |
| POT05 | 462.00   | 1.54     |              | 0.43     | 462.00       | 27.60    |              | 21.80   |             |
| POT06 | 309.49   | 1.46     | 309.49       | 0.33     | 309.49       | 33.70    | 309.49       | 19.94   | 309.49      |
| POT07 | 202.76   | 1.15     |              | 0.37     |              | 47.00    | 202.76       | 12.67   | 202.76      |
| POT08 | 208.64   | 1.20     |              | 0.22     | 208.64       | 32.63    |              | 14.07   | 208.64      |
| POT09 | 130.49   | 1.07     |              | 0.20     |              | 26.86    |              | 18.06   |             |
| POT10 | 281.26   | 1.38     |              | 0.27     | 281.26       | 32.68    | 281.26       | 18.43   | 281.26      |
| POT11 | 365.53   | 1.49     | 365.53       | 0.38     | 365.53       | 28.24    |              | 19.56   | 365.53      |
| POT12 | 386.08   | 1.48     |              | 0.39     | 386.08       | 32.29    |              | 21.21   | 386.08      |
| COR01 | 332.96   | 1.56     | 332.96       | 0.41     | 332.96       | 23.62    | 332.96       | 18.68   | 332.96      |
| COR02 | 353.30   | 1.85     | 353.30       | 0.43     | 353.30       | 24.73    | 353.30       | 21.35   | 353.30      |
| COR03 | 328.54   | 1.71     | 328.54       | 0.33     | 328.54       | 24.80    | 328.54       | 21.28   | 328.54      |
| COR04 | 309.31   | 1.71     | 309.31       | 0.39     | 309.31       | 24.47    | 309.31       | 21.19   | 309.31      |
| COR05 | 307.67   | 1.92     | 307.67       | 0.28     | 307.67       | 24.50    | 307.67       | 21.44   | 307.67      |
| COR06 | 320.54   | 1.96     | 320.54       | 0.30     | 320.54       | 26.88    | 320.54       | 23.37   | 320.54      |
| COR07 | 307.77   | 2.03     | 307.77       | 0.30     | 307.77       | 27.72    | 307.77       | 25.16   |             |
| COR08 | 330.91   | 1.95     | 330.91       | 0.25     | 330.91       | 26.22    | 330.91       | 20.60   | 330.91      |
| COR09 | 373.99   | 1.85     | 373.99       | 0.30     | 373.99       | 27.01    |              | 20.69   | 373.99      |
| COR10 | 334.59   | 1.79     | 334.59       | 0.37     | 334.59       | 26.71    | 334.59       | 22.31   | 334.59      |
| COR11 | 346.84   | 1.89     | 346.84       | 0.30     | 346.84       | 25.60    | 346.84       | 23.45   | 346.84      |
| COR12 | 200.19   | 1.66     |              | 0.20     | 200.19       | 25.05    |              | 9.36    | 200.19      |

|         |        |        |        |        |
|---------|--------|--------|--------|--------|
| Average | 335.48 | 331.72 | 312.77 | 319.34 |
| SD      | 24.20  | 59.54  | 38.18  | 59.40  |
| RSD     | 0.07   | 0.18   | 0.12   | 0.19   |
| 1+RSD   | 1.1    | 1.18   | 1.1    | 1.2    |
| 1+2RSD  | 1.1    | 1.36   | 1.2    | 1.4    |
| 1+3RSD  | 1.2    | 1.54   | 1.4    | 1.6    |

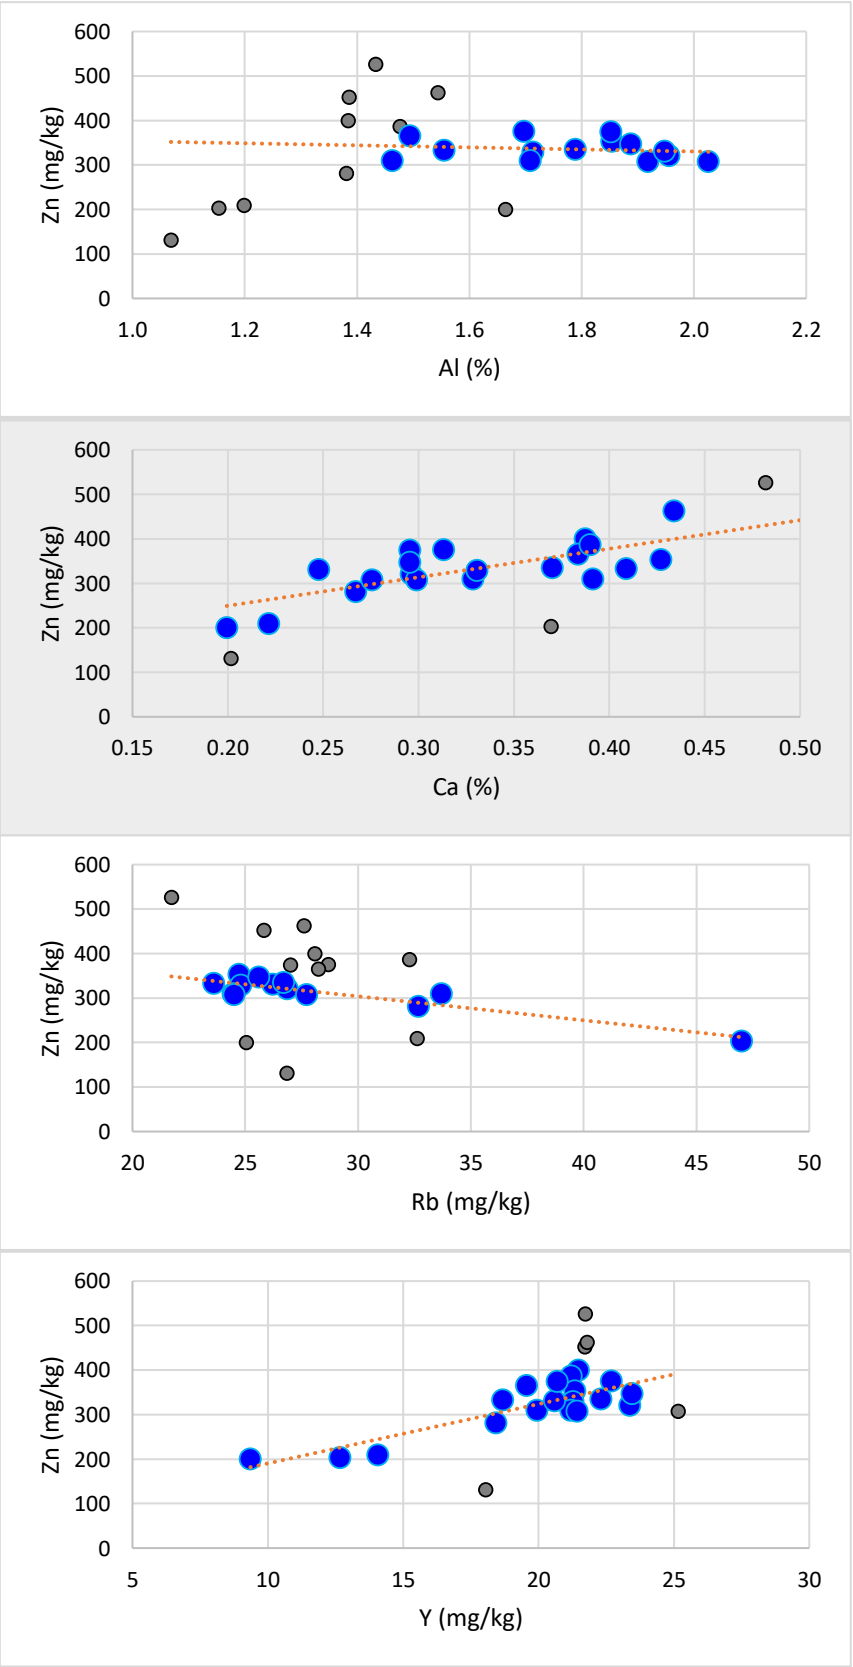

Supplement: s1 [file s1]
